# Supplementary material
Source: publisher figshare collection journal article supplement (https://acs.figshare.com/ndownloader/files/4098052)

## Supporting Information

### $^1\text{H}$ and $^{13}\text{C}$ NMR Spectra

for

#### **Birch Reductive Alkylation of Methyl *m*-(Hydroxymethyl)benzoate Derivatives and the Behavior of *o*- and *p*-(Hydroxymethyl)benzoates under Reductive Alkylation Conditions**

Samuel J. Fretz, Christopher M. Hadad, David J. Hart\*, Shubham Vyas and Dexi Yang

Department of Chemistry and Biochemistry, The Ohio State University 100 W. 18<sup>th</sup> Avenue, Columbus, OH 43210.

[hart@chemistry.ohio-state.edu](mailto:hart@chemistry.ohio-state.edu)

### TABLE OF CONTENTS

#### *Experiments Described in Tables 3-4 and Scheme 5*

|                 |        |
|-----------------|--------|
| Table 3 Entry 1 | S2-4   |
| Table 3 Entry 2 | S5-6   |
| Table 3 Entry 3 | S7-15  |
| Table 4 Entry 1 | S16-18 |
| Table 4 Entry 3 | S19-27 |
| Scheme 5        | S28-30 |

Nuclei Refer

• =  $\text{CH}_2$   $\text{CH}_2$  27  $\text{CH}_2$  10  
 x =  $\text{CH}_2$   $\text{CH}_2$  21  $\text{CH}_2$  1  
 o =  $\text{CH}_2$   $\text{CH}_2$  24  $\text{CH}_2$  2

Table 3 Entry 1

crude from  $\text{CH}_2$  w/ 2 equiv  $\text{tBuOH}$

crude product = 445 mg

and some other stuff  
in lesser amounts

Current Data Parameters  
 NAME DUH-III-254  
 EXPNO 1  
 PROCNO 1  
 F2 - Acquisition Parameters  
 Date\_ 20120328  
 Time\_ 15.06  
 INSTRUM spect  
 PROBD 5 mm PABBO BB/  
 PULPROG zg30  
 TD 65536  
 SOLVENT C6D6  
 NS 16  
 DS 2  
 SWH 8223.685 Hz  
 FIDRES 0.125483 Hz  
 AQ 3.9846387 sec  
 RG 79.06  
 DW 60.800 usec  
 DE 6.50 usec  
 TE 300.2 K  
 D1 1.00000000 sec  
 TD0 1  
 ===== CHANNEL f1 =====  
 NUC1  $^1\text{H}$   
 P1 15.00 usec  
 PLW1 12.52000046 W  
 SFO1 400.1724712 MHz  
 F2 - Processing parameters  
 SI 65536  
 SF 400.1700027 MHz  
 WDW EM  
 SSB 0  
 LB 0.30 Hz  
 GB 0  
 PC 1.00

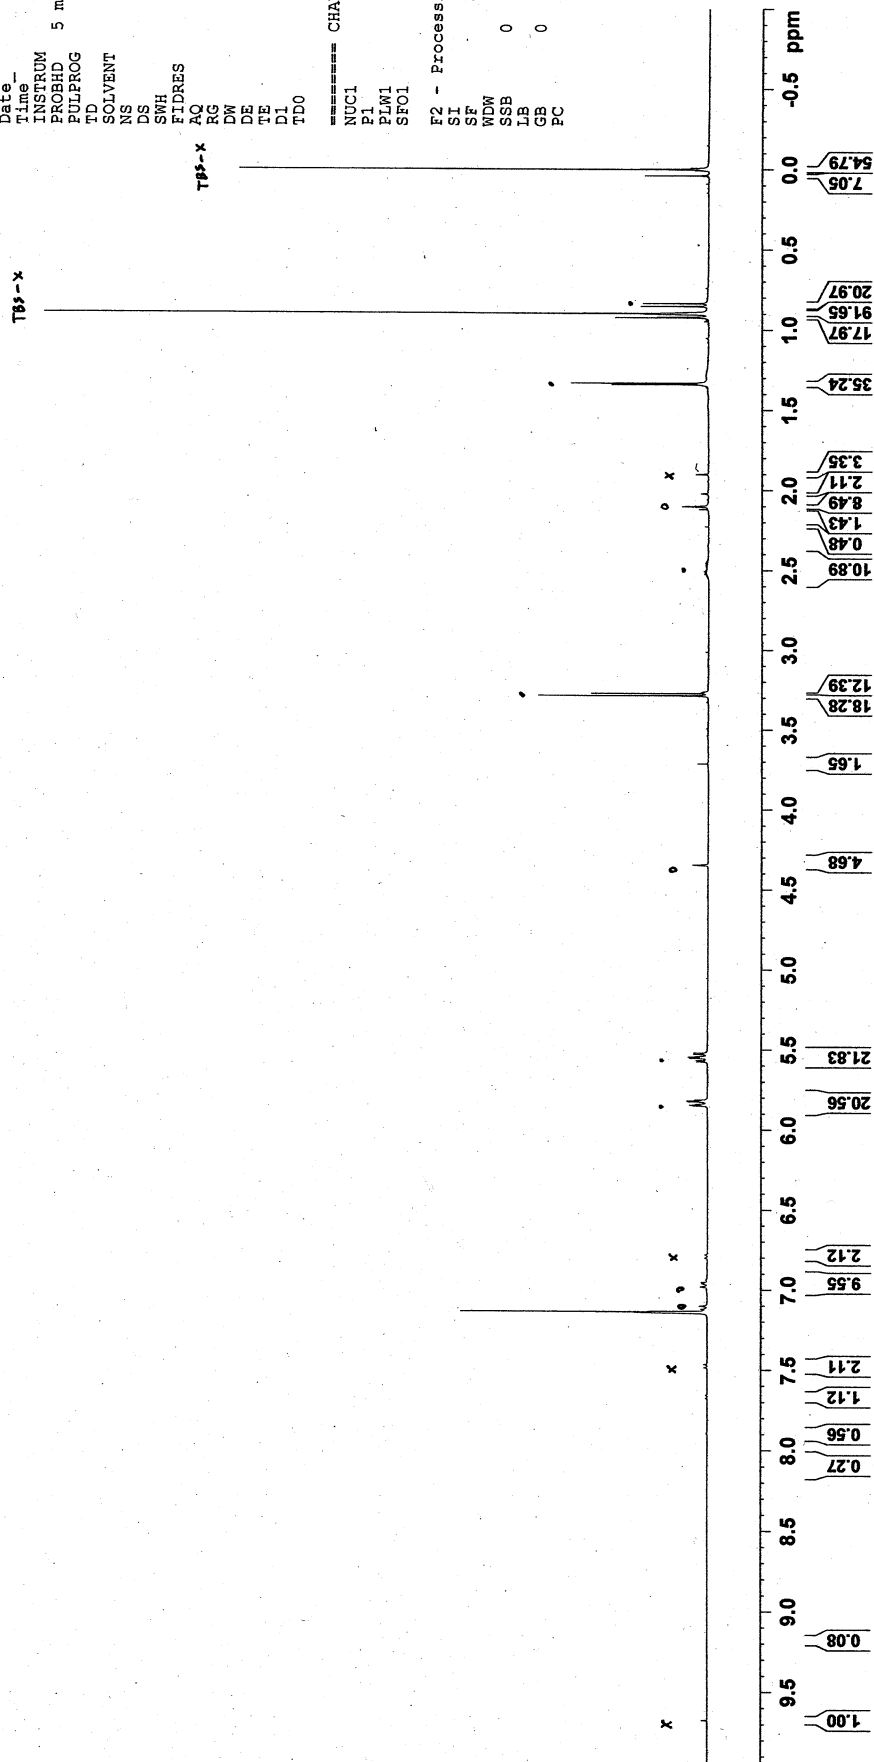

Fractions 6-8

Table 3 Entry 1

27

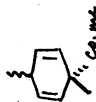

from

OTBS w/ 2 equiv tBuSH

Current Data Parameters  
NAME DJH-III-255-68  
EXENO 1  
PROCNO 1

F2 - Acquisition Parameters

Date\_ 20120329  
Time\_ 14.26  
INSTRUM spect  
PROBHD 5 mm PABBO BB/  
PULPROG zg30  
TD 65536  
SOLVENT C6D6  
NS 16  
DS 2  
SWH 8223.685 Hz  
FIDRES 0.125483 Hz  
AQ 3.9846387 sec  
RG 120.36  
DM 60.800 use  
DE 6.50 use  
TE 300.2 K  
D1 1.00000000 sec  
TD0 1

CHANNEL f1  
NUC1 1H  
P1 15.00 use  
PLW1 12.52000046 W  
SFO1 400.1724712 MHz

F2 - Processing parameters  
SI 65536  
SF 400.1699990 MHz  
WDW EM  
SSB 0  
LB 0.30 Hz  
GB 0  
PC 1.00

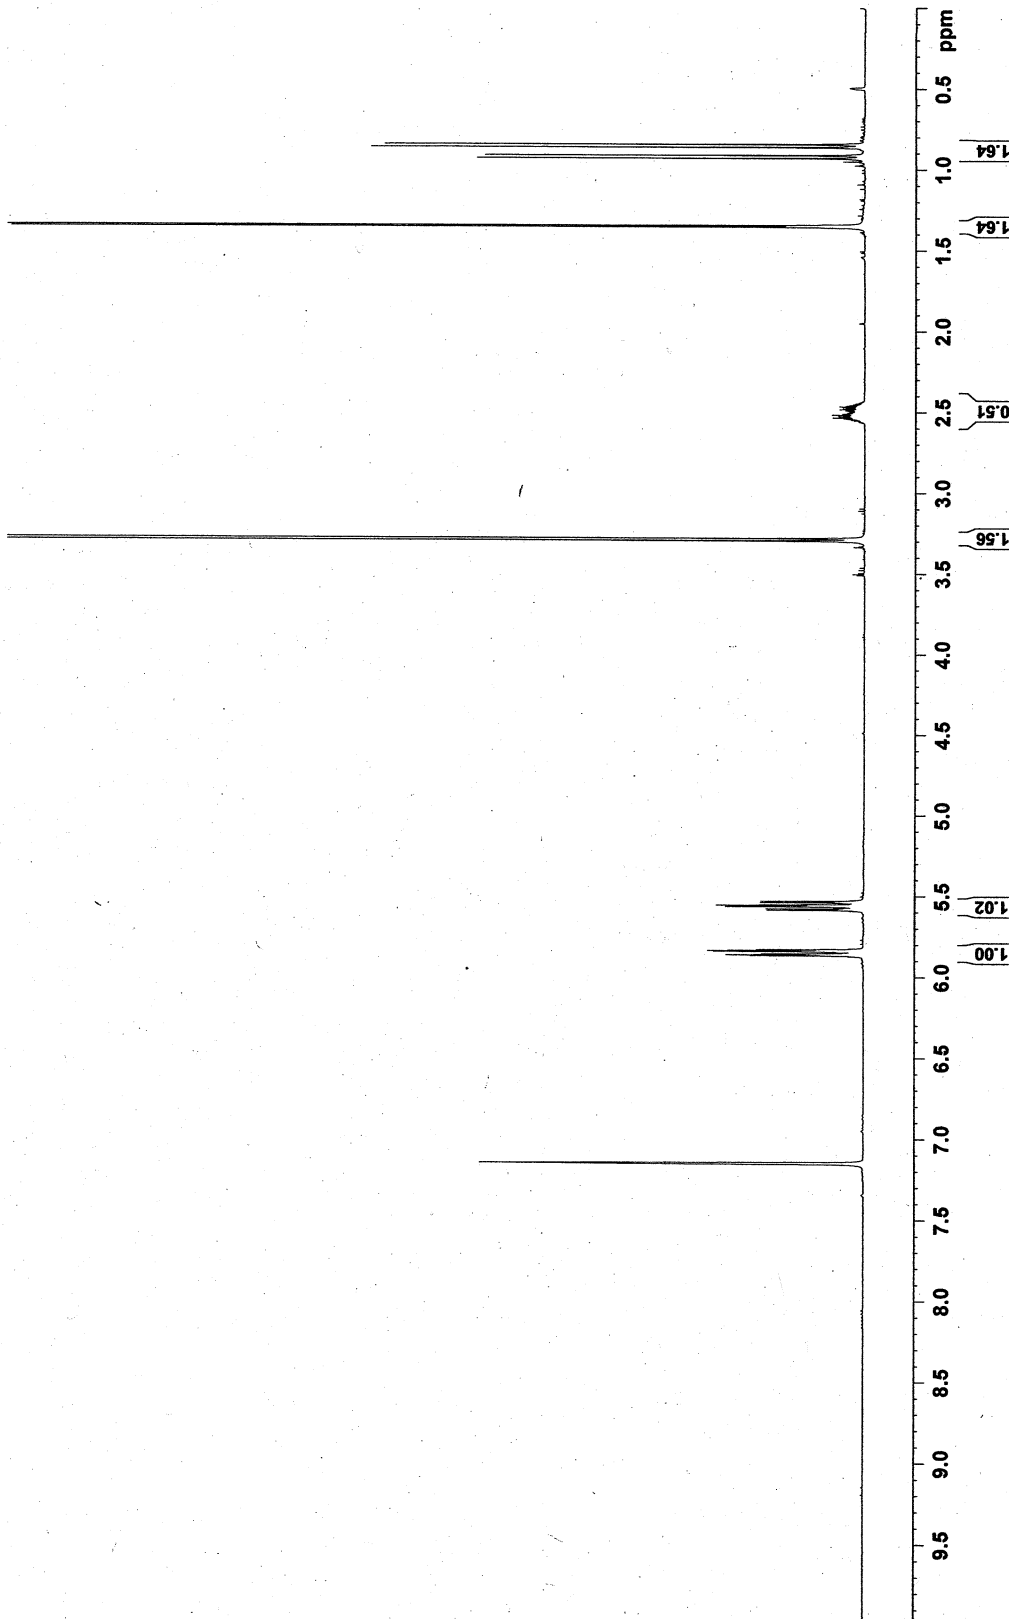

Table 3 Entry 1  
 Fractions 9-10

MW 166

MW 120

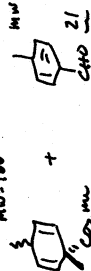

2.8 : 2  
 1.4 : 1

from c1ccc(cc1)C(=O)O w/ Zequiv BuOH

Current Data Parameters  
 NAME DJH-III-255-910  
 EXPNO 1  
 PROCNO 1

F2 - Acquisition Parameters  
 Date\_ 20120329  
 Time\_ 14.21  
 INSTRUM spect  
 PROBD 5 mm PABBO BB/  
 PULPROG zg30  
 TD 65536  
 SOLVENT C6D6  
 NS 16  
 DS 2  
 SWH 8223.685 Hz  
 FIDRES 0.125483 Hz  
 AQ 3.9846387 sec  
 RG 112.47  
 DW 60.800 usec  
 DE 6.50 usec  
 TE 300.2 K  
 D1 1.00000000 sec  
 TD0 1

===== CHANNEL f1 =====  
 NUC1 1H  
 P1 15.00 usec  
 PLW1 12.52000046 W  
 SFO1 400.1724712 MHz

F2 - Processing parameters  
 SI 65536  
 SF 400.1699994 MHz  
 WDW EM  
 SSB 0  
 LB 0.30 Hz  
 GB 0  
 PC 1.00

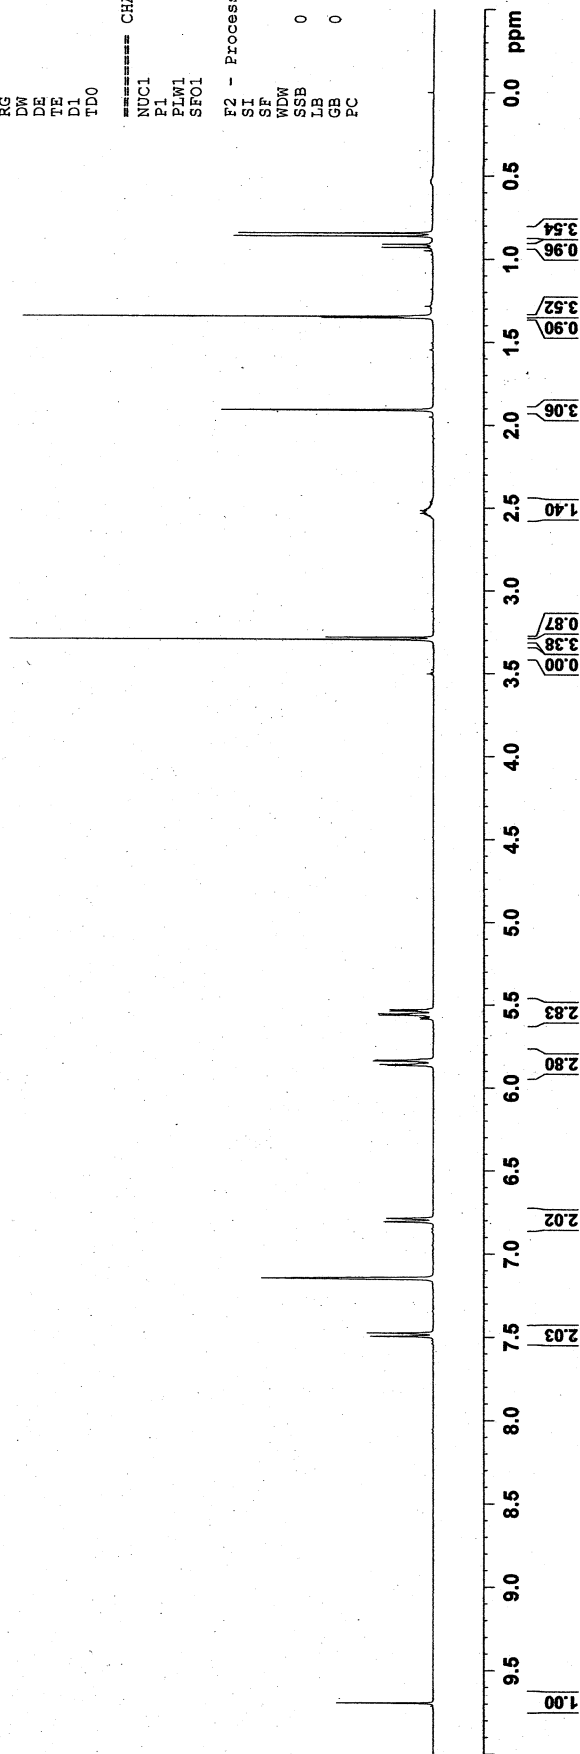



Chromatographed

from  $\text{C}_{10}\text{H}_{16}$  w/zevuv + Bush

MW = 166

27

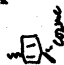

MW = 120

21

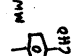

MW = 152

18

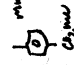

Table 3 Entry 2

Current Data Parameters  
NAME DJH-III-253  
EXPNO 1  
PROCNO 1

F2 - Acquisition Parameters  
Date\_ 20120328  
Time\_ 15.02  
INSTRUM spect  
PROBHD 5 mm PABBO BB/  
PULPROG zg30  
TD 65536  
SOLVENT C6D6  
NS 16  
DS 2  
SWH 8223.685 Hz  
FIDRES 0.125483 Hz  
AQ 3.9846387 sec  
RG 99.77  
DW 60.800 usec  
DE 6.50 usec  
TE 300.2 K  
D1 1.00000000 sec  
TD0 1

CHANNEL f1  
NUC1  $^1\text{H}$   
P1 15.00 usec  
PLW1 12.52000046 W  
SFO1 400.1724712 MHz

F2 - Processing parameters  
SI 65536  
SF 400.1700044 MHz  
EM  
WDW 0  
SSB 0  
LB 0.30 Hz  
GB 0  
PC 1.00

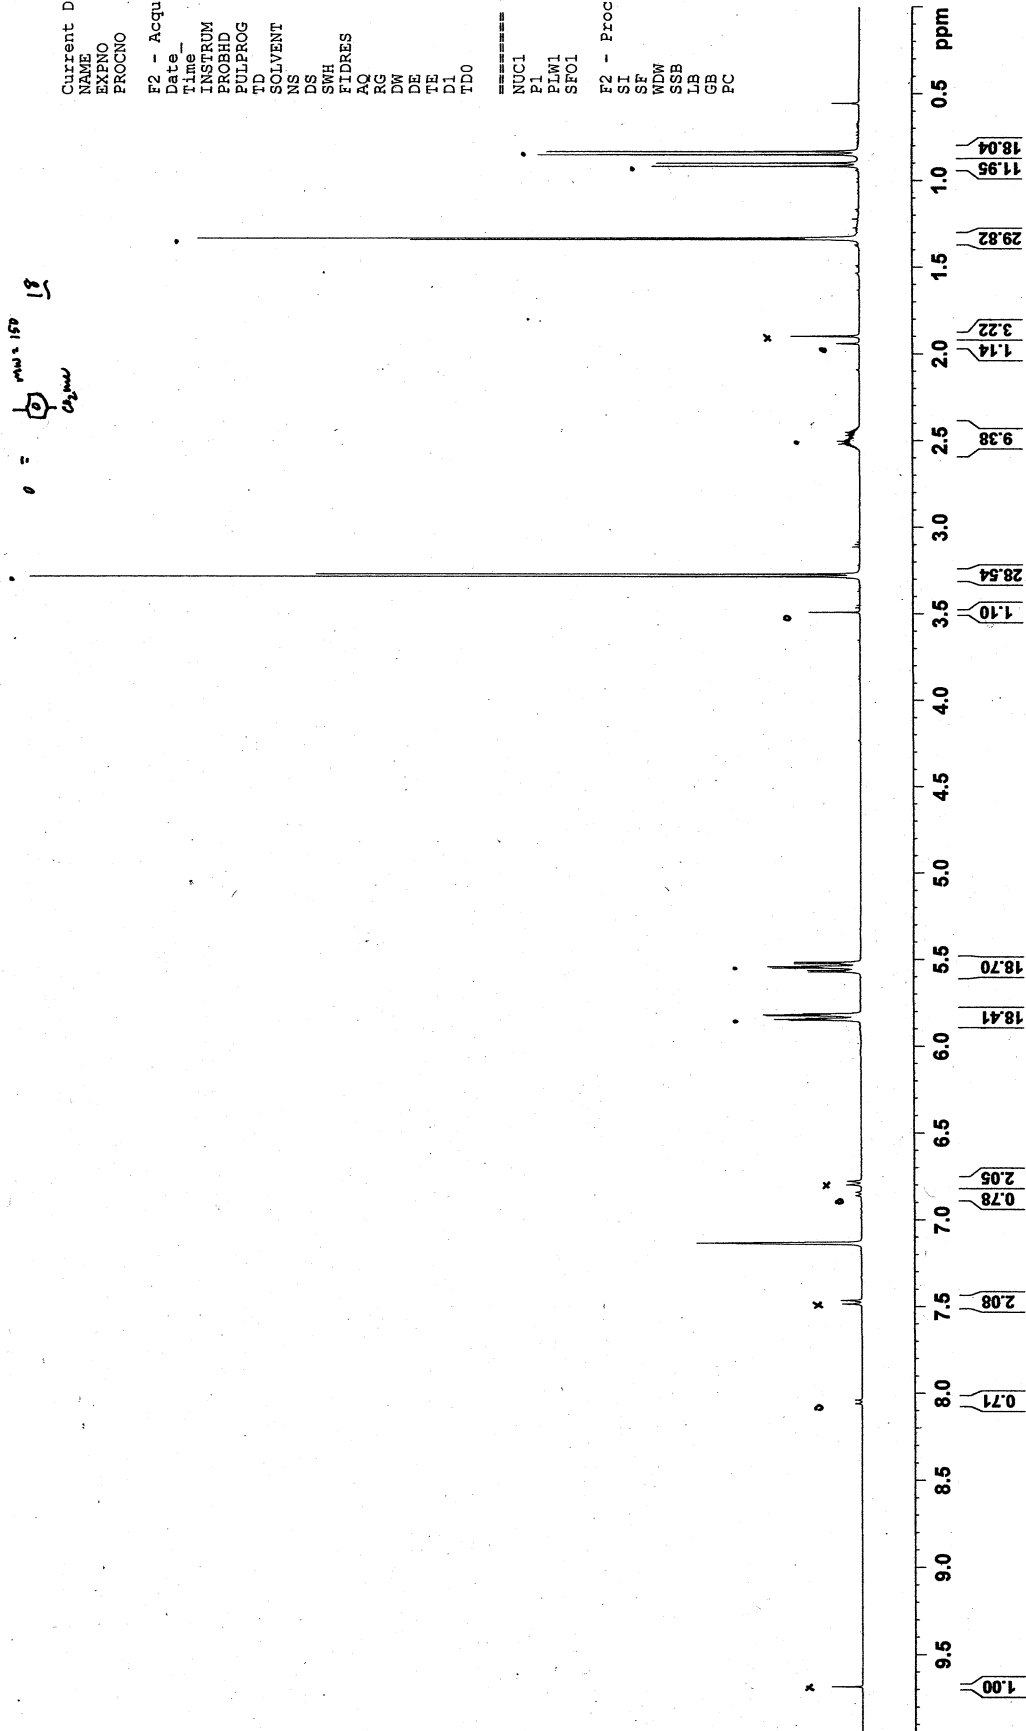

Table 3 Entry 3

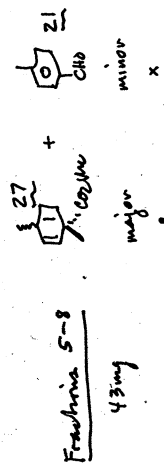

Current Data Parameters  
 NAME DuH-III-275a  
 EXPNO 1  
 PROCNO 1

F2 - Acquisition Parameters  
 Date\_ 20120502  
 Time 14.01  
 INSTRUM spect  
 PROBD 5 mm PABBO BB/  
 PULPROG zg30  
 TD 65536  
 SOLVENT CDCl3  
 NS 16  
 DS 2  
 SWH 8223.685 Hz  
 FIDRES 0.125483 Hz  
 AQ 3.9846387 sec  
 RG 112.47  
 DW 60.800 usec  
 DE 6.50 usec  
 TE 300.2 K  
 D1 1.00000000 sec  
 TD0 1

===== CHANNEL f1 =====  
 NUC1 1H  
 P1 15.00 usec  
 PLW1 12.52000046 W  
 SFO1 400.1724712 MHz

F2 - Processing parameters  
 SI 65536  
 SF 400.1700000 MHz  
 WDW EM  
 SSB 0  
 LB 0.30 Hz  
 GB 0  
 PC 1.00

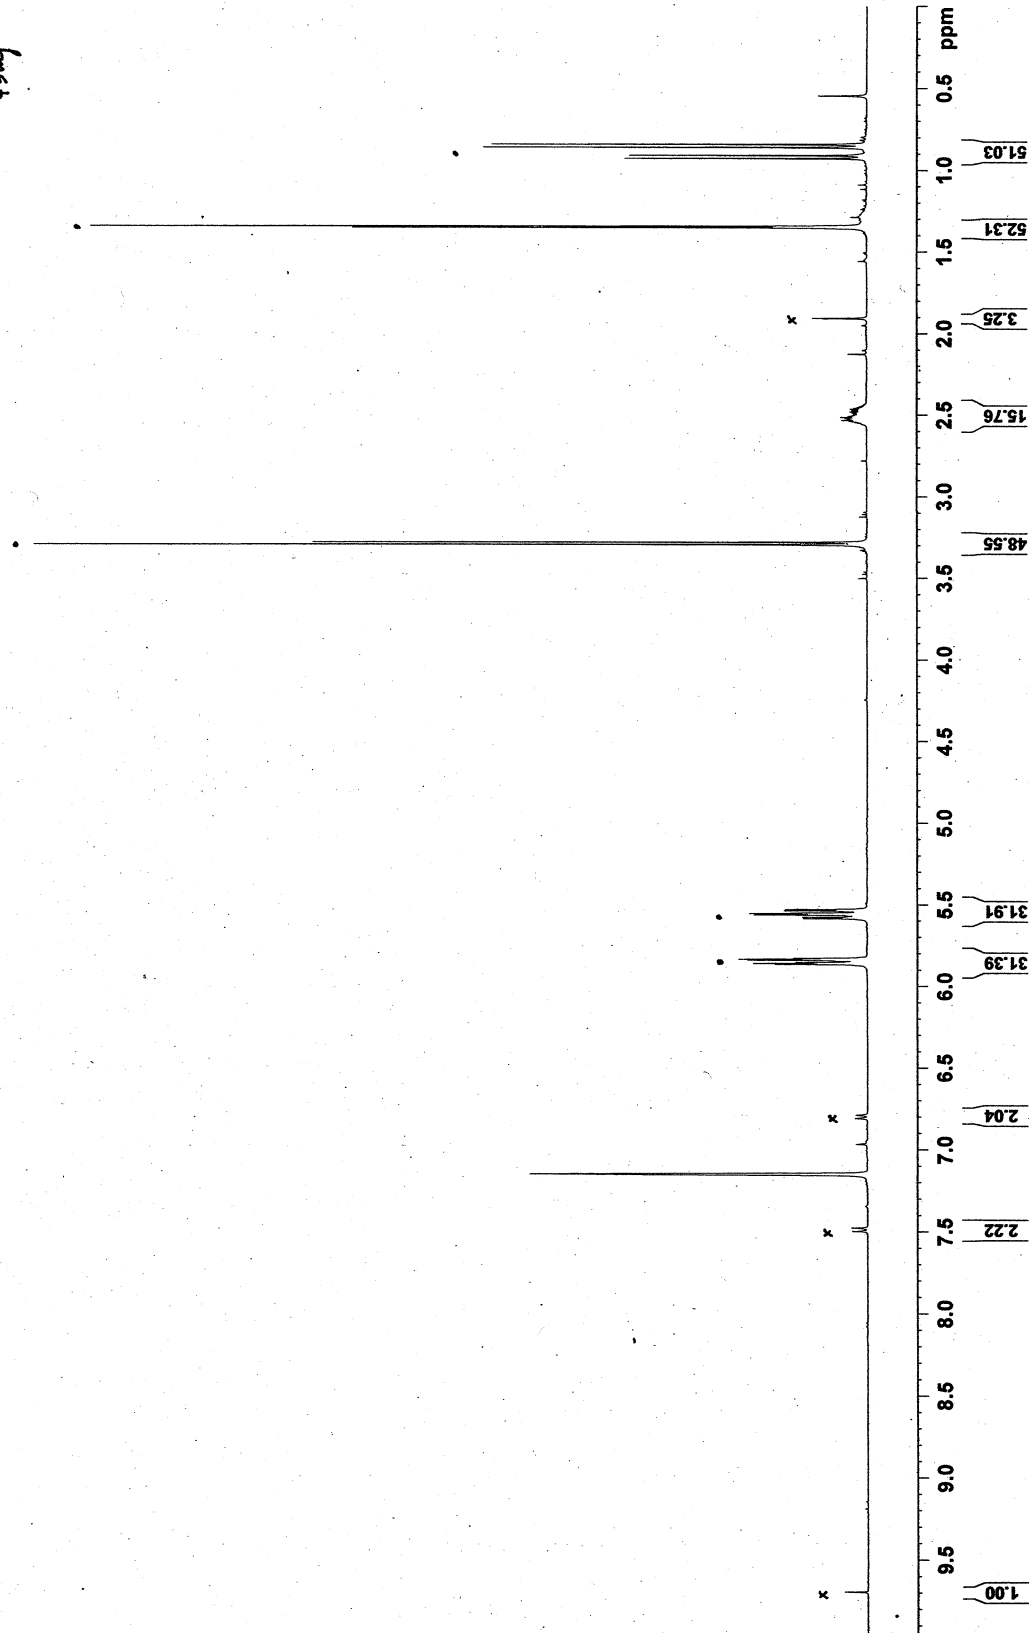

c1ccc(cc1)C(=O)O  
 x = minor  
 o = major  
 30  
 Fraction 24

Table 3 Entry 3

Current Data Parameters  
 NAME DJH-III-275d  
 EXPNO 1  
 PROCNO 1

F2 - Acquisition Parameters  
 Date\_ 20120502  
 Time\_ 14.14  
 INSTRUM spect  
 PROBHD 5 mm PABBO BB/  
 PULPROG zg30  
 TD 65536  
 SOLVENT C6D6  
 NS 16  
 DS 2  
 SWH 8223.685 Hz  
 FIDRES 0.125483 Hz  
 AQ 3.9846387 sec  
 RG 134.1  
 DW 60.800 usec  
 DE 6.50 usec  
 TE 300.2 K  
 D1 1.00000000 sec  
 TD0 1

CHANNEL f1  
 NUC1 1H  
 P1 15.00 usec  
 PL1 12.5200046 W  
 SFO1 400.1724712 MHz

F2 - Processing parameters  
 SI 65536  
 SF 400.1700000 MHz  
 EQ 0  
 LB 0.30 Hz  
 GB 0  
 PC 1.00

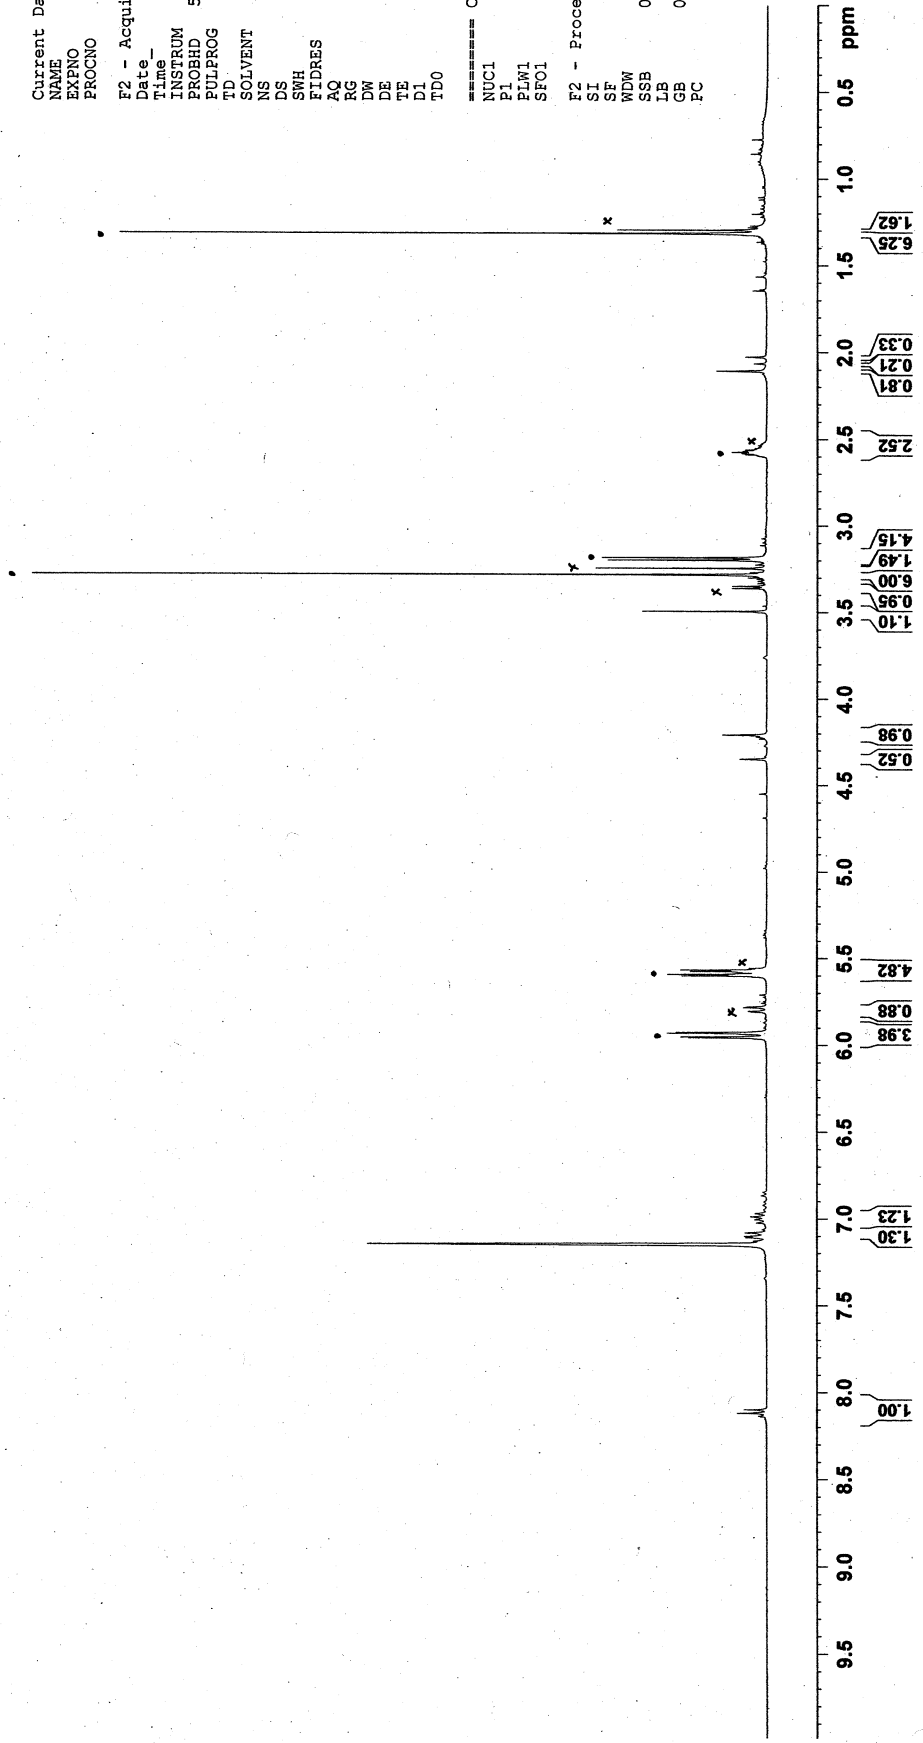



Table 3 Entry 3

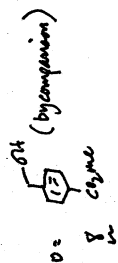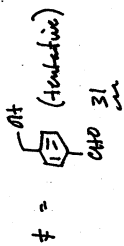

Fraction 25-27

• = EtOAc

Current Data Parameters  
 NAME DJH-III-275c  
 EXPNO 1  
 PROCNO 1  
 F2 - Acquisition Parameters  
 Date\_ 20120502  
 Time 14.03  
 INSTRUM spect  
 PROBHD 5 mm PABBO BB/  
 PULPROG zg30  
 TD 65536  
 SOLVENT C6D6  
 NS 16  
 DS 2  
 SWH 8223.685 Hz  
 FIDRES 0.125483 Hz  
 AQ 3.9846387 sec  
 RG 112.47  
 DW 60.800 usec  
 DE 6.50 usec  
 TE 300.2 K  
 D1 1.00000000 sec  
 TDO 1

CHANNEL f1  
 NUC1 1H  
 P1 15.00 usec  
 PL1 12.52000046 W  
 SF01 400.1724712 MHz

F2 - Processing parameters  
 SI 65536  
 SF 400.1700072 MHz  
 EM  
 SSB 0  
 LB 0  
 GB 0  
 PC 1.00

x (major): x (minor): # : o = 8:4:2:1

Reductive ALE: RCHO: SM = 12:2:1

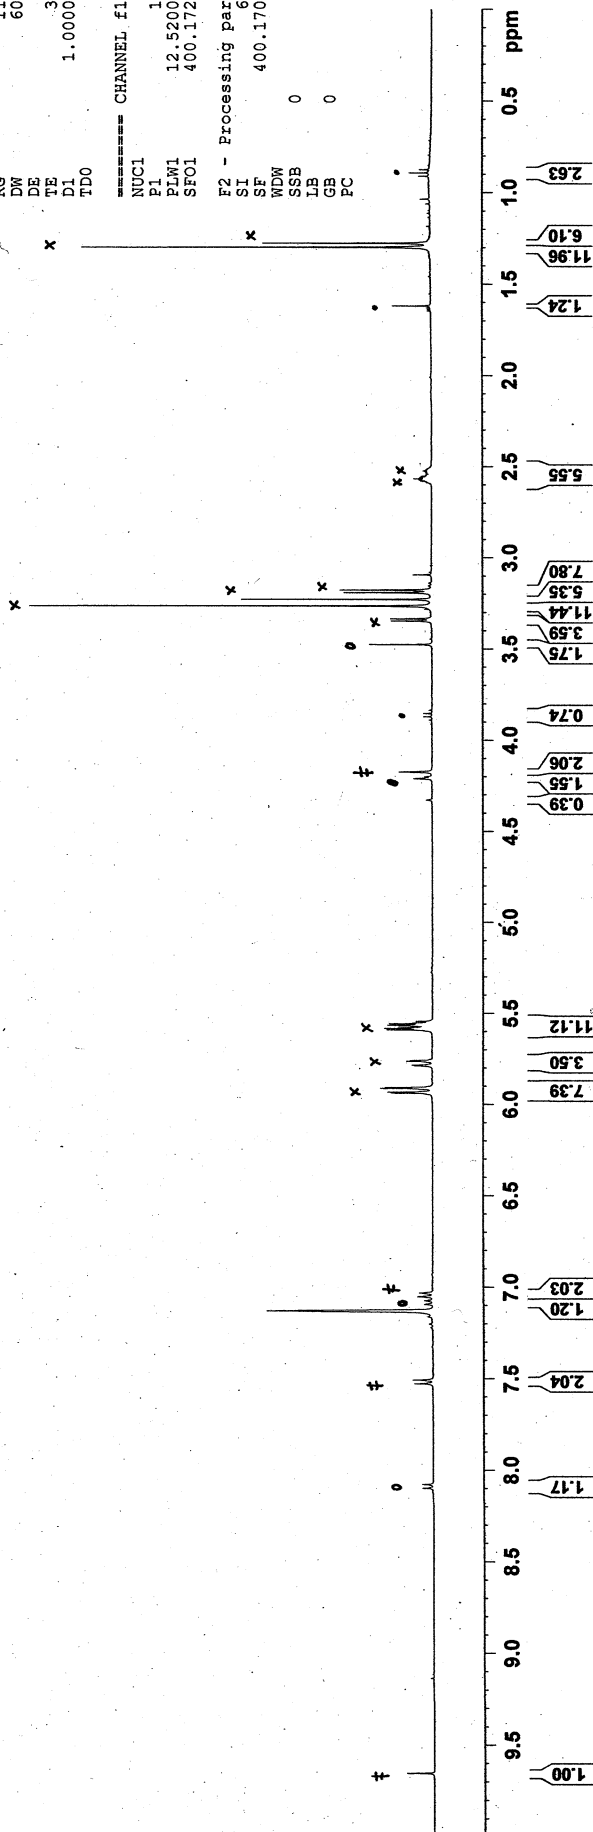

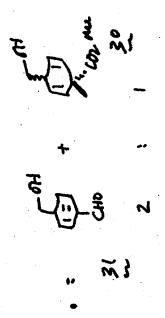

Table 3 Entry 3  
6mg

Current Data Parameters  
 NAME DJH-III-275e  
 EXPNO 1  
 PROCNO 1

F2 - Acquisition Parameters  
 Date\_ 20120507  
 Time 13.19  
 INSTRUM spect  
 PROBHD 5 mm PABBO BB/  
 PULPROG zg30  
 TD 65536  
 SOLVENT C6D6  
 NS 16  
 DS 2  
 SWH 8223.685 Hz  
 FIDRES 0.125483 Hz  
 AQ 3.9846397 sec  
 RG 188.13  
 DW 60.800 usec  
 DE 6.50 usec  
 TE 300.2 K  
 D1 1.00000000 sec  
 TDO 1

CHANNEL f1 1H  
 NUC1 1H  
 P1 15.00 usec  
 PLW1 12.52000046 W  
 SFO1 400.1724712 MHz

F2 - Processing parameters  
 SI 65536  
 SF 400.1700000 MHz  
 EM  
 SSB 0  
 LB 0  
 GB 0  
 PC 1.00

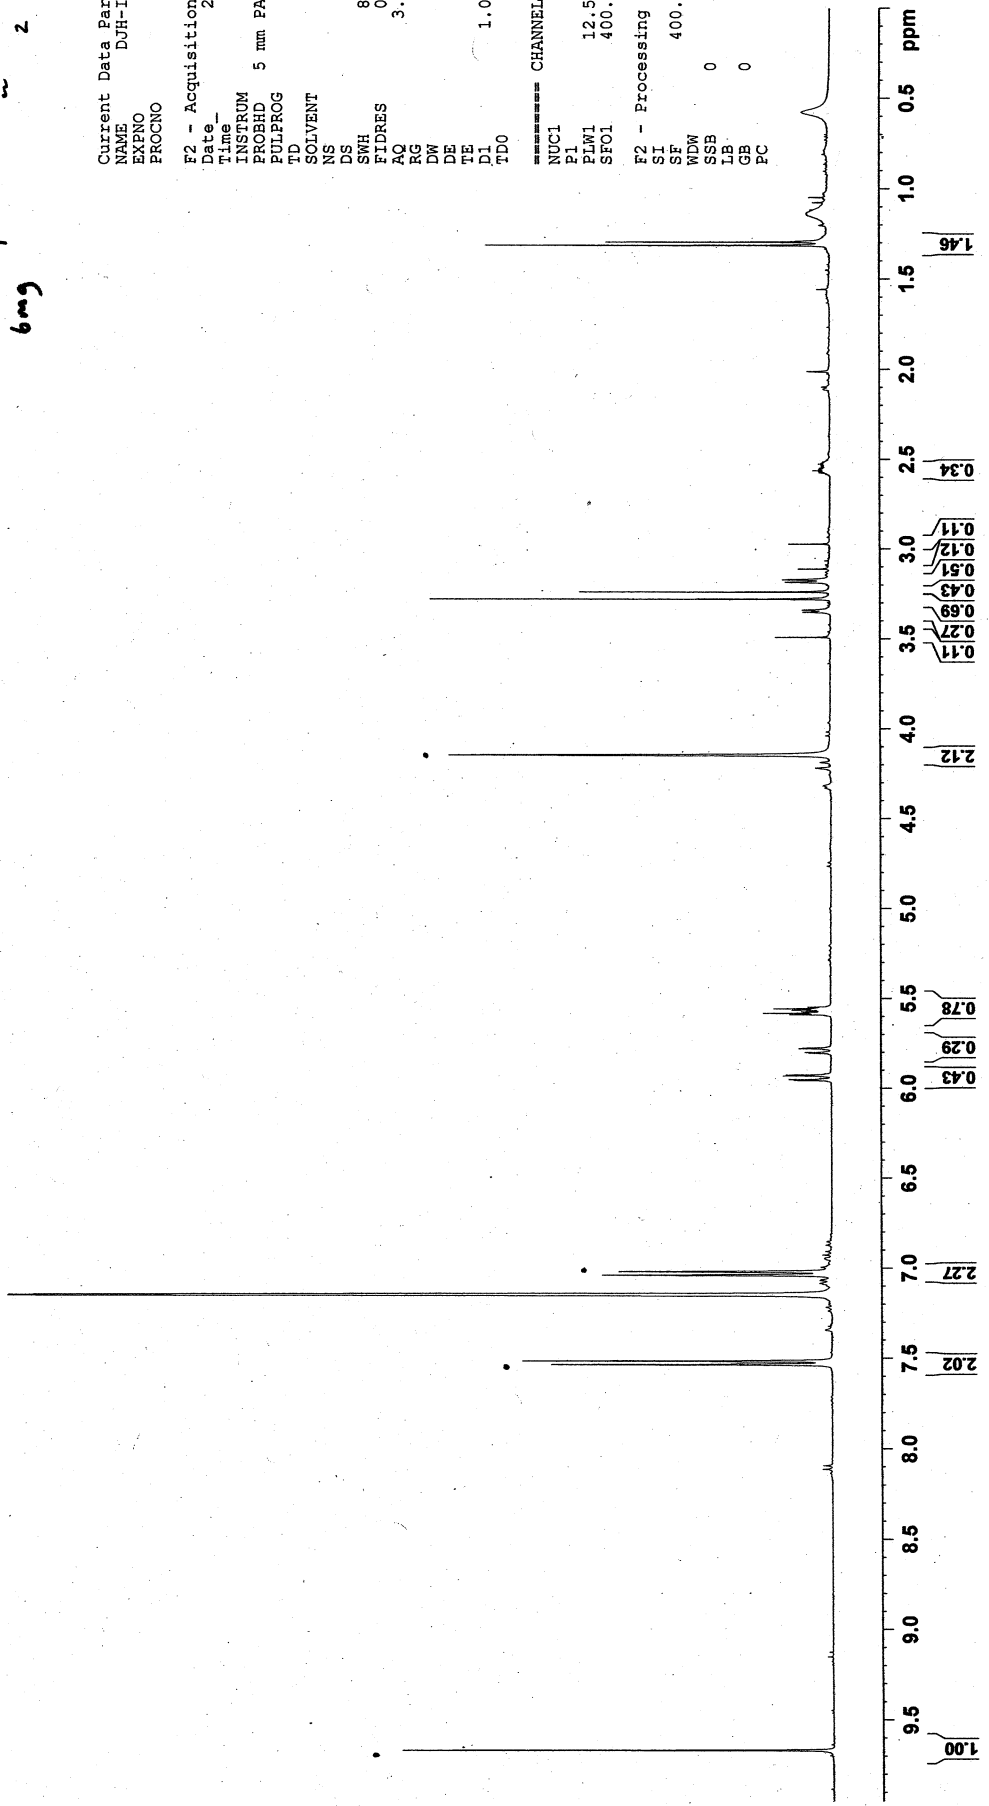



Table 3 Entry 3  
 Fractions 24-27 combined

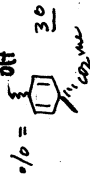

191.24  
 174.59  
 148.37  
 146.71  
 130.83  
 130.71  
 129.87  
 129.66  
 126.65  
 126.60  
 126.39  
 126.12

65.90  
 65.17  
 64.13  
 64.02  
 51.87  
 51.58  
 51.43  
 44.94  
 44.62  
 39.25  
 39.08  
 27.98  
 26.36

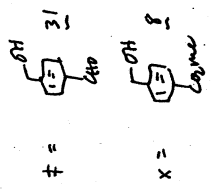

Current Data Parameters  
 NAME DJH-III-275  
 EXPNO 2  
 PROCNO 1  
 F2 - Acquisition Parameters  
 Date\_ 20120703  
 Time 0.13  
 INSTRUM spect  
 PROBHD 5 mm PABBO BB/  
 PULPROG zgpg30  
 TD 65536  
 SOLVENT C6D6  
 NS 1024  
 DS 4  
 SWH 24038.461 Hz  
 FIDRES 0.366798 Hz  
 AQ 1.3631988 sec  
 RG 2050  
 DW 20.800 usec  
 DE 6.50 usec  
 TE 300.2 K  
 D1 2.00000000 sec  
 D11 0.03000000 sec  
 TD0 1

CHANNEL f1  
 NUC1 13C  
 P1 9.50 usec  
 PLW1 48.00000000 W  
 SFO1 100.6328883 MHz

CHANNEL f2  
 CPDPRG2 waltz16  
 NUC2 1H  
 PCPD2 80.00 usec  
 PLW2 12.52000046 W  
 PLW12 0.44016001 W  
 PLW13 0.28169999 W  
 SFO2 400.1716007 MHz

F2 - Processing parameters  
 SI 32768  
 SF 100.6228049 MHz  
 EM  
 WDW 0  
 SSB 0  
 LB 1.00 Hz  
 GB 0  
 PC 1.40

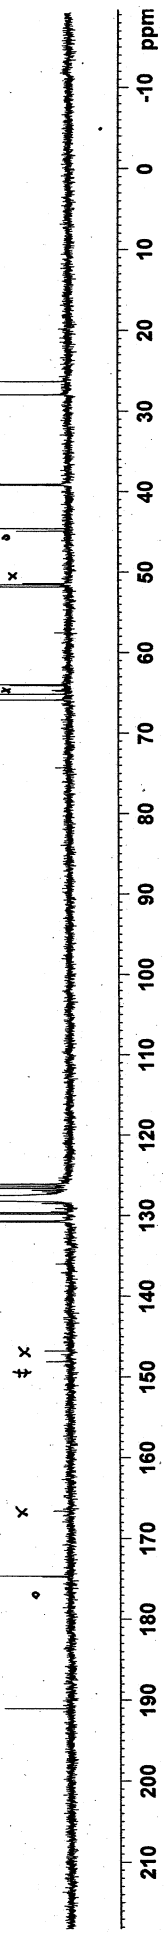

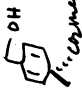

Table 3 Entry 3 Expansion

10 = 10000

Frashers 24-27 combined

Current Data Parameters  
NAME DJH-III-275  
EXPNO 2  
PROCNO 1

F2 - Acquisition Parameters  
Date\_ 20120703  
Time 0.13  
INSTRUM spect  
PROBHD 5 mm PABBO BB/  
PULPROG zgpg30  
TD 65536  
SOLVENT CS<sub>2</sub>  
NS 1024  
DS 4  
SWH 24038.461 Hz  
FIDRES 0.366798 Hz  
AQ 1.3631988 sec  
RG 2050  
DW 20.800 usec  
DE 6.50 usec  
TE 300.2 K  
D1 2.00000000 sec  
D11 0.03000000 sec  
TD0 1

===== CHANNEL f1 =====  
NUC1 <sup>13</sup>C  
P1 9.50 usec  
PLW1 48.00000000 W  
SFO1 100.6328883 MHz

===== CHANNEL f2 =====  
CPDPRG2 waltz16  
NUC2 <sup>1</sup>H  
PCPD2 80.00 usec  
PLW2 12.52000046 W  
PLW12 0.44016001 W  
PLW13 0.28169999 W  
SFO2 400.1716007 MHz

F2 - Processing parameters  
SI 32768  
SF 100.6228049 MHz  
WDW EM  
SSB 0  
LB 1.00 Hz  
GB 0  
PC 1.40

174.74  
174.59

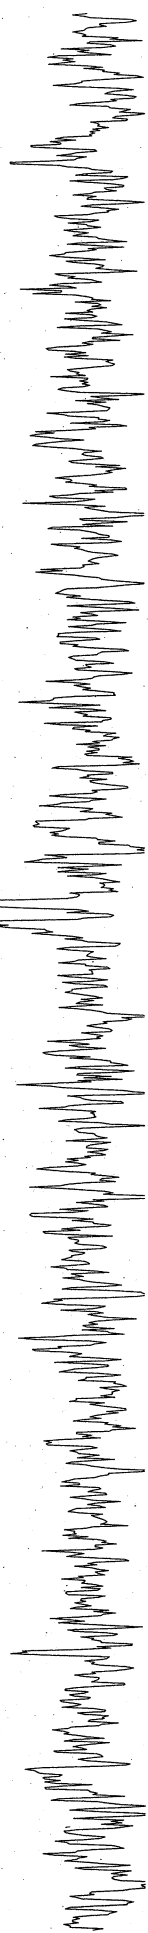

179.5 179.0 178.5 178.0 177.5 177.0 176.5 176.0 175.5 175.0 174.5 174.0 173.5 173.0 172.5 172.0 171.5 171.0 170.5 ppm

S13

Table 3 Entry 3 Fraction 24-27 combined

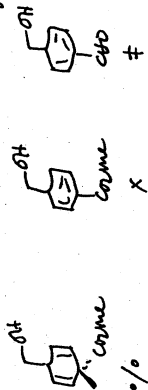

Current Data Parameters  
NAME DJH-III-275  
EXPNO 2  
PROCNO 1

F2 - Acquisition Parameters  
Date\_ 20120703  
Time 0.13  
INSTRUM spect  
PROBHD 5 mm PABBO BB/  
PULPROG zgpg30  
TD 65536  
SOLVENT C6D6  
NS 1024  
DS 4  
SWH 24038.461 Hz  
FIDRES 0.366798 Hz  
AQ 1.3631988 sec  
RG 2050  
DW 20.800 usec  
DE 6.50 usec  
TE 300.2 K  
D1 2.00000000 sec  
D11 0.03000000 sec  
TD0 1

===== CHANNEL f1 =====  
NUC1 13C  
P1 9.50 usec  
PLW1 48.00000000 W  
SFO1 100.6328883 MHz

===== CHANNEL f2 =====  
CPDPRG2 waltz16  
NUC2 1H  
PCPD2 80.00 usec  
PLW2 12.52000046 W  
PLW12 0.44016001 W  
PLW13 0.28169999 W  
SFO2 400.1716007 MHz

F2 - Processing parameters  
SI 32768  
SF 100.6228049 MHz  
WDW EM  
SSB 0  
LB 1.00 Hz  
GB 0  
PC 1.40

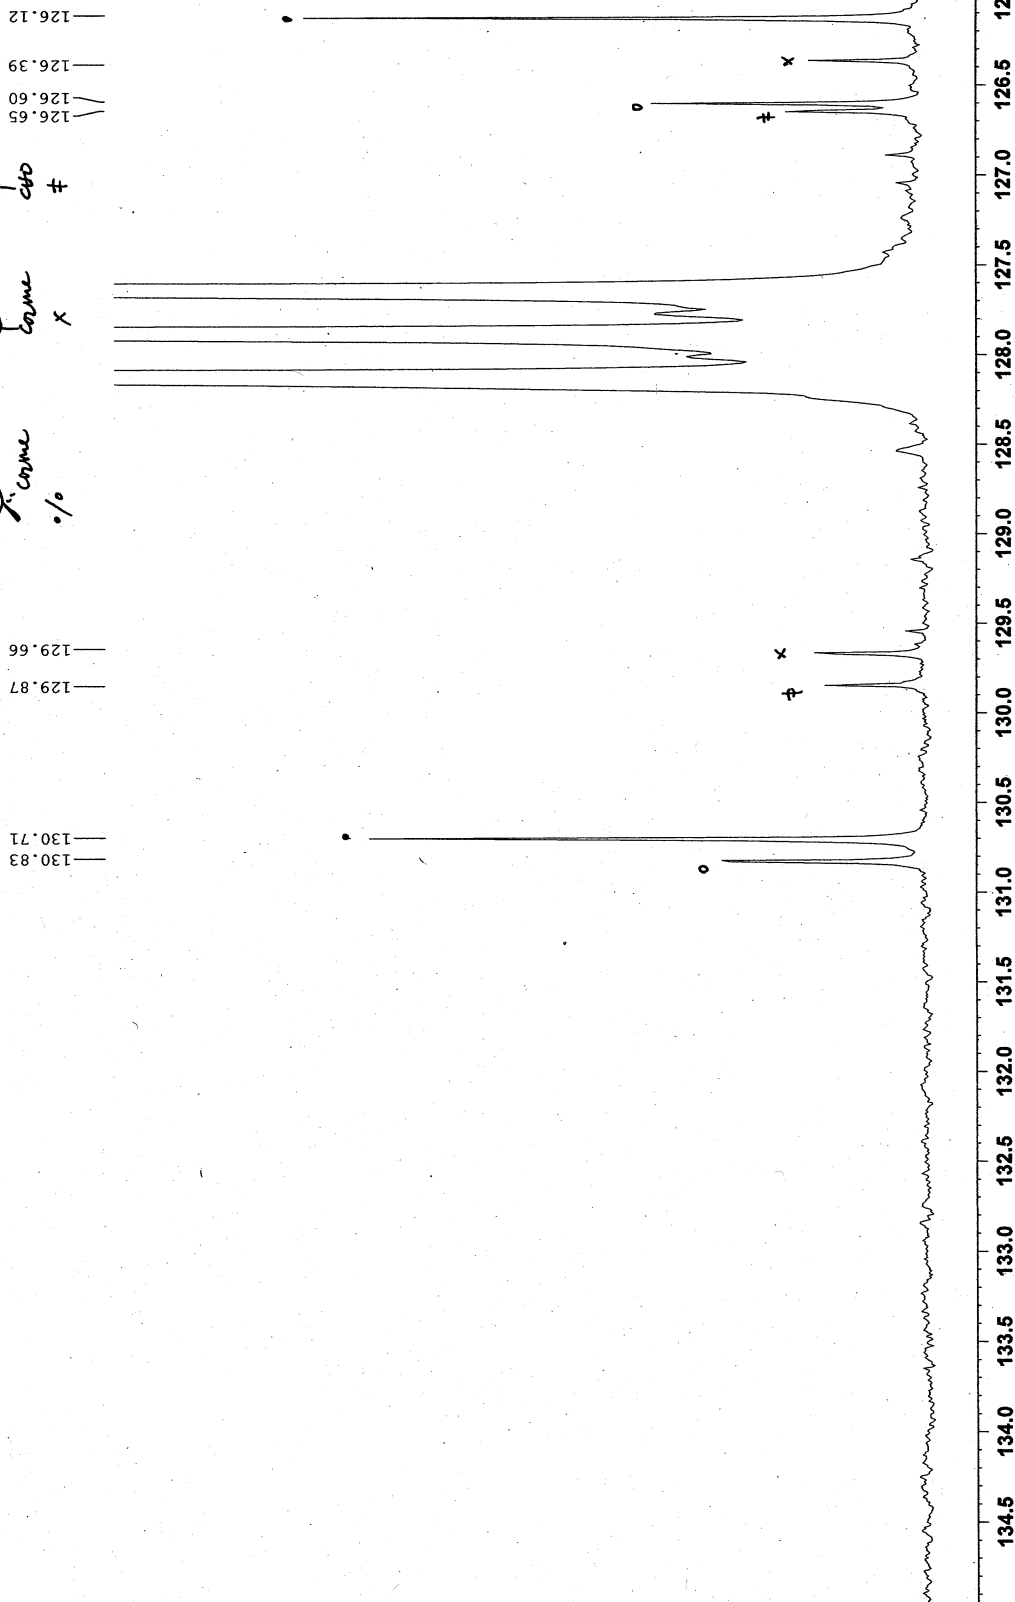

Fructose 24-27 combined

Table 3 Entry 3

Expansion

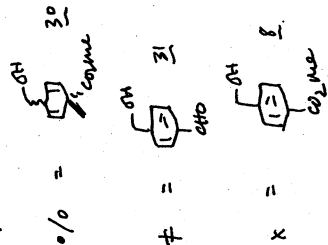

39.08  
39.25

44.62  
44.94

51.87  
51.58  
51.43

64.02  
64.13  
65.17  
65.90

Current Data Parameters  
 NAME DJH-III-275  
 EXFNO 2  
 PROCNO 1  
 F2 - Acquisition Parameters  
 Date\_ 20120703  
 Time\_ 0.13  
 INSTRUM spect  
 PROBHD 5 mm PABBO BH/  
 PULPROG zgpg30  
 TD 65536  
 SOLVENT C6D6  
 NS 1024  
 DS 4  
 SWH 24038.461 Hz  
 FIDRES 0.366798 Hz  
 AQ 1.3631988 sec  
 RG 2050  
 DW 20.800 usec  
 DE 6.50 usec  
 TE 300.2 K  
 D1 2.00000000 sec  
 D11 0.03000000 sec  
 TD0 1

===== CHANNEL f1 =====  
 NUC1 13C  
 P1 9.50 usec  
 PLW1 48.00000000 W  
 SFO1 100.6328883 MHz  
 ===== CHANNEL f2 =====  
 CPDPRG2 waltz16  
 NUC2 1H  
 PCPD2 80.00 usec  
 PLW2 12.52000046 W  
 PLW12 0.44016001 W  
 PLW13 0.28169999 W  
 SFO2 400.1716007 MHz

F2 - Processing parameters  
 SI 32768  
 SF 100.6228049 MHz  
 WDW EM  
 SSB 0  
 LB 0  
 GB 0  
 PC 1.40

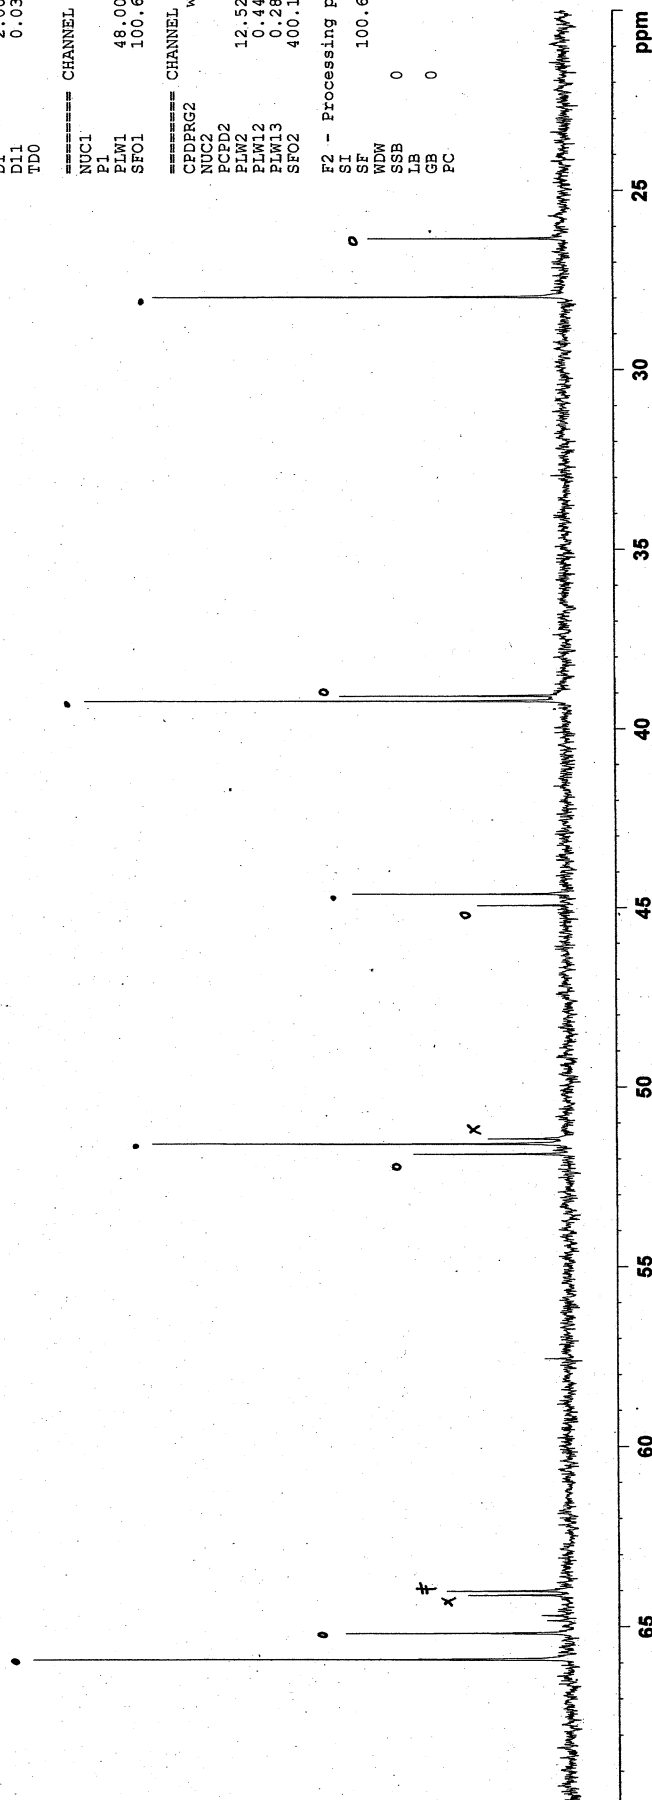

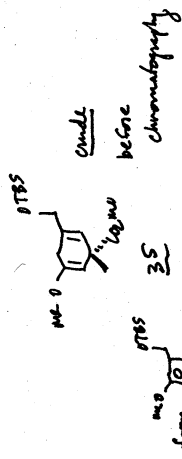

| Current Data Parameters |             |
|-------------------------|-------------|
| NAME                    | DJH-III-260 |
| EXPNO                   | 1           |
| PROCNO                  | 1           |

| F2 - Acquisition Parameters |                |
|-----------------------------|----------------|
| Date_                       | 20120403       |
| Time                        | 15.57          |
| INSTRUM                     | spec           |
| PROBHD                      | 5 mm PABBO B57 |
| PULPROG                     | zg30           |
| TD                          | 65536          |
| SOLVENT                     | C6D6           |
| NS                          | 16             |
| DS                          | 2              |
| SWH                         | 8223.685 Hz    |
| FIDRES                      | 0.125483 Hz    |
| AQ                          | 3.9846387 sec  |
| RG                          | 134.1          |
| WDW                         | 60.800 use     |
| SS                          | 6.50 use       |
| TE                          | 300.2 K        |
| DE                          | 1.00000000 sec |
| TD0                         | 1              |

```

===== CHANNEL f1 =====
NUC1      1H
P1        15.00 use:
PLW1      12.52000046 W
SF01      400.1724712 MHz

```

```

F2 - Processing parameters
SI      65536
SF      400.1700054 MHz
WDW      EM
SSB      0
LB      0.30 Hz
GB      0
PC      1.00

```

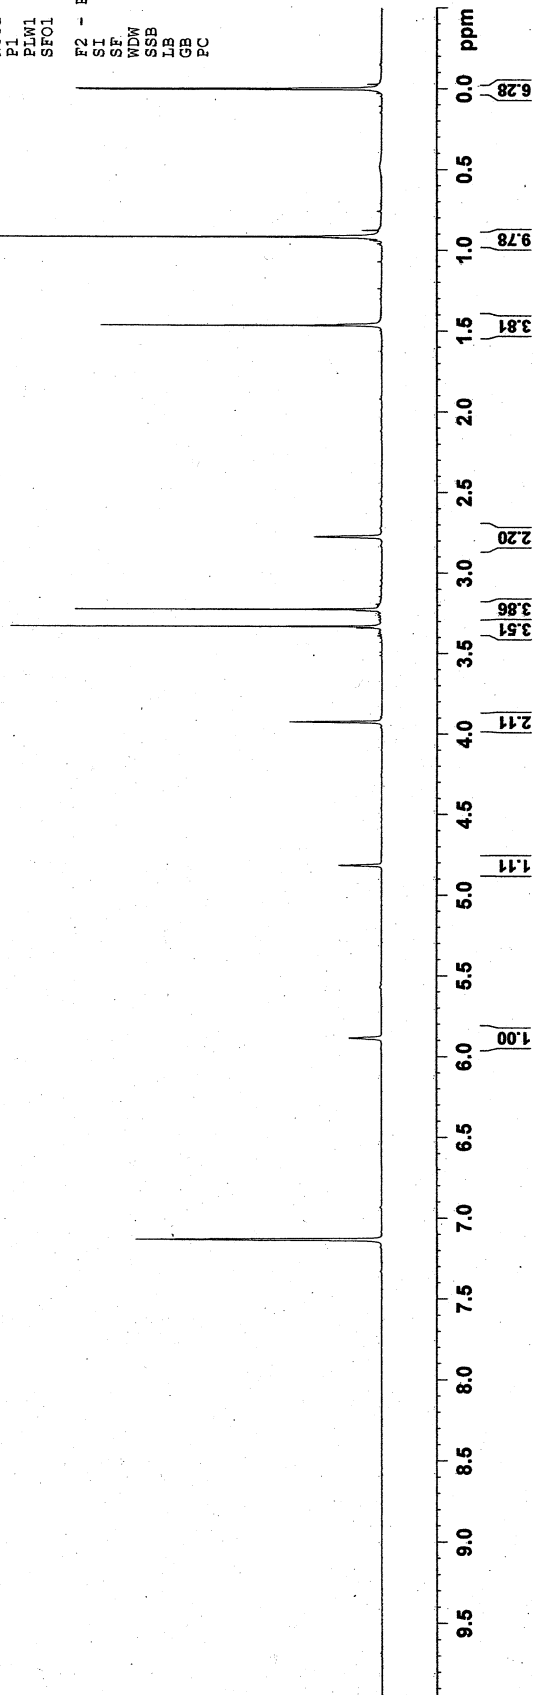



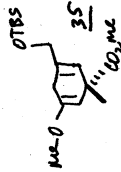

Table 4 Entry 1

Fraction 9-15

after chromatography

Current Data Parameters  
 NAME DUH-III-261-915  
 EXPNO 1  
 PROCNO 1

F2 - Acquisition Parameters  
 Date\_ 20120403  
 Time\_ 16.01  
 INSTRUM spect  
 PROBHD 5 mm PABBO BB/  
 PULPROG zg30  
 TD 65536  
 SOLVENT C6D6  
 NS 16  
 DS 2  
 SWH 8223.685 Hz  
 FIDRES 0.125483 Hz  
 AQ 3.9846387 sec  
 RG 120.36  
 DW 60.800 usec  
 DE 6.50 usec  
 TE 300.2 K  
 D1 1.00000000 sec  
 TD0 1

===== CHANNEL f1 =====  
 NUC1 1H  
 P1 15.00 usec  
 PLW1 12.52000046 W  
 SFO1 400.1724712 MHz

F2 - Processing parameters  
 SI 65536  
 SF 400.1700076 MHz  
 EM  
 WDW 0  
 SSB 0  
 LB 0.30 Hz  
 GB 0  
 PC 1.00

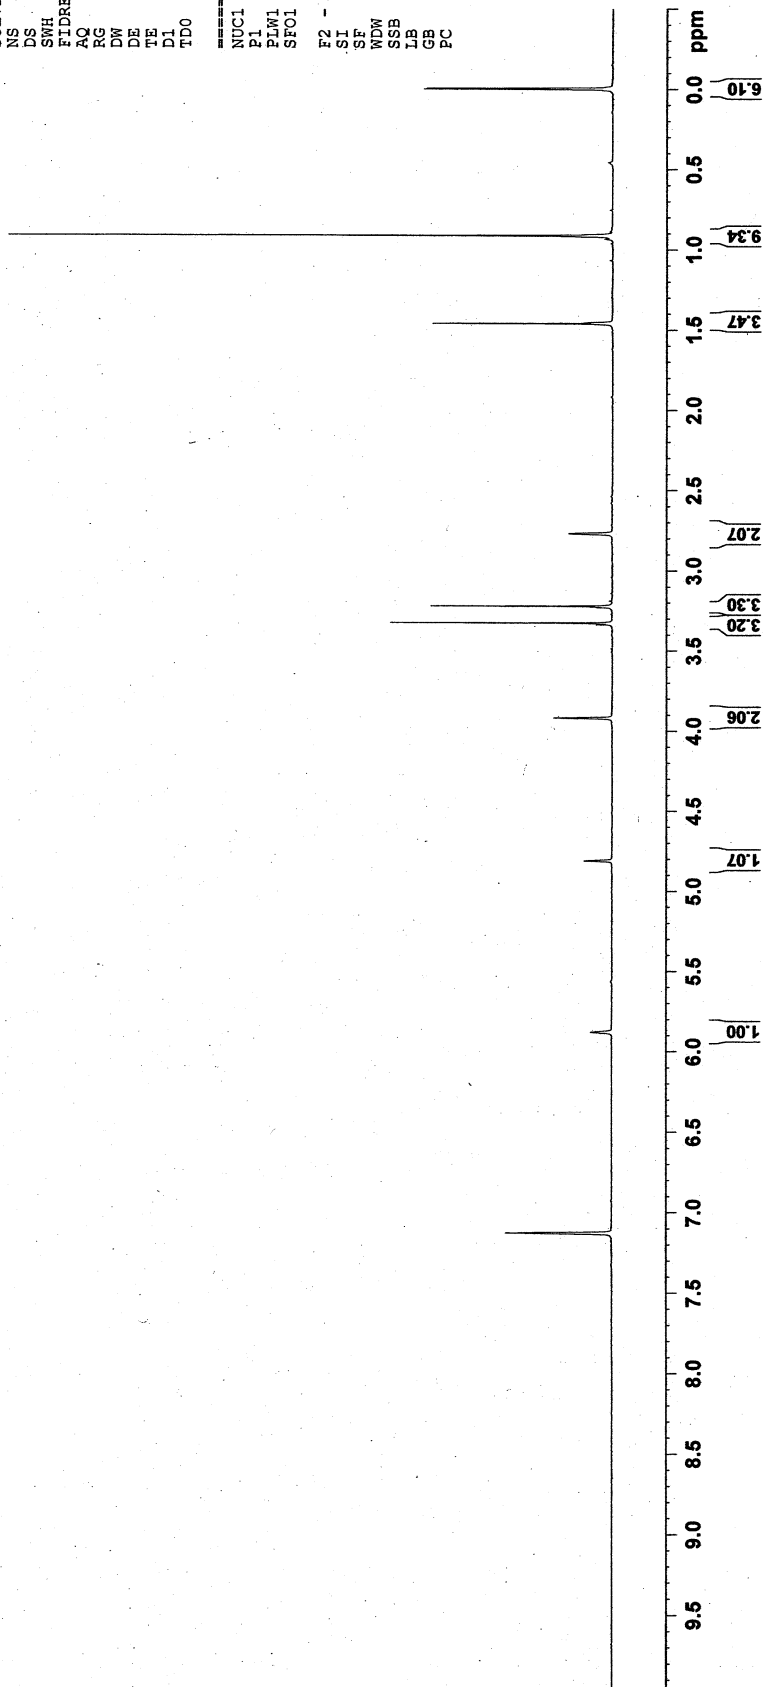

35 *obs after 24h in water*  
tube

Table 4 Entry 1

Current Data Parameters  
 NAME DJH-III-257-914  
 EXPNO 3  
 PROCNO 1  
 F2 - Acquisition Parameters  
 Date\_ 20120404  
 Time\_ 3.00  
 INSTRUM spect  
 PROBHD 5 mm PABBO BB/  
 PULPROG zgpg30  
 TD 65536  
 SOLVENT C6D6  
 NS 1024  
 DS 4  
 SWH 24038.461 Hz  
 FIDRES 0.366798 Hz  
 AQ 1.3631988 sec  
 RG 2050  
 DW 20.900 usec  
 DE 6.50 usec  
 TE 300.2 K  
 D1 2.00000000 sec  
 D11 0.03000000 sec  
 TDO 1  
 =====  
 CHANNEL f1 =====  
 NUC1 13C  
 P1 9.50 usec  
 PLW1 48.00000000 W  
 SFO1 100.6328863 MHz  
 =====  
 CHANNEL f2 =====  
 CPDPRG2 waltz16  
 NUC2 1H  
 P2 80.00 usec  
 PLW2 12.52000046 W  
 PLW12 0.44016001 W  
 PLW13 0.28169999 W  
 SFO2 400.1716007 MHz  
 F2 - Processing parameters  
 SI 32768  
 SF 100.6228049 MHz  
 EM  
 WDW 0  
 SSB 0  
 LB 1.00 Hz  
 GB 0  
 PC 1.40

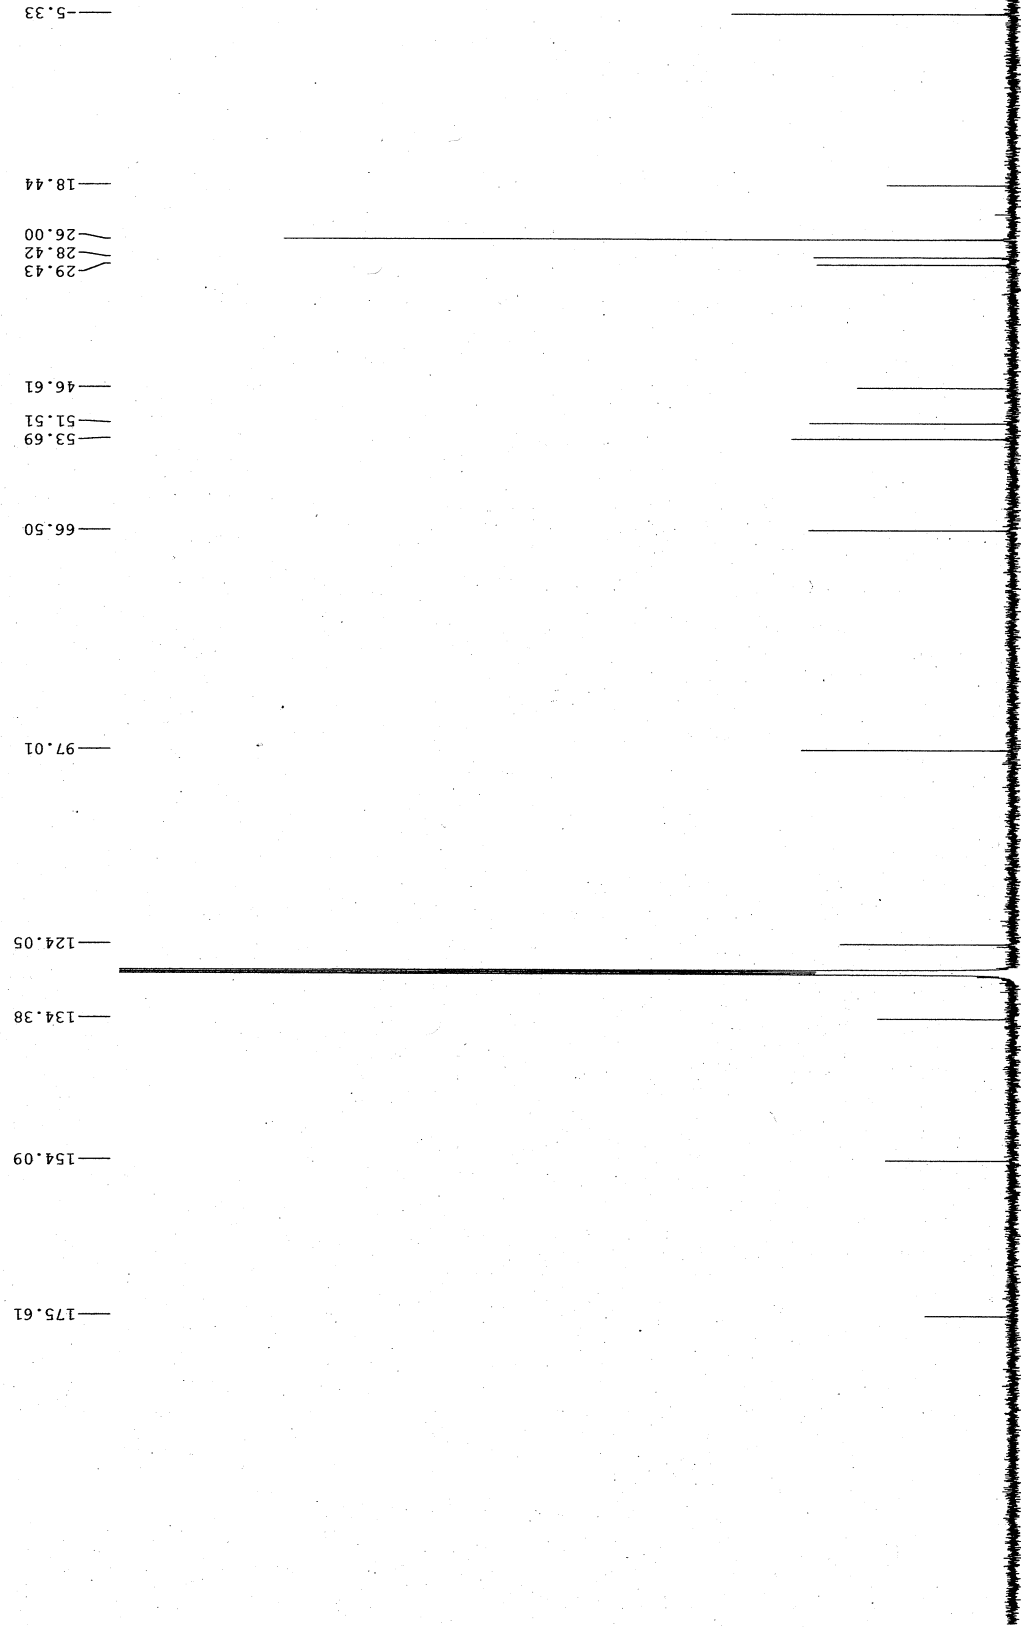

ppm  
 210 200 190 180 170 160 150 140 130 120 110 100 90 80 70 60 50 40 30 20 10 0

518

Table 4 Entry 3

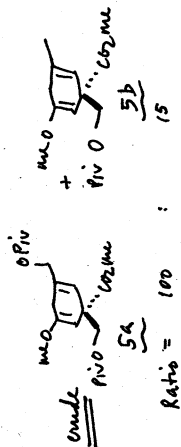

Current Data Parameters  
 NAME DJH-III-291  
 EXPNO 1  
 PROCNO 1

F2 - Acquisition Parameters  
 Date\_ 20120710  
 Time\_ 14.25  
 INSTRUM spect  
 PROBHD 5 mm PABBO BB/  
 PULPROG zg30  
 TD 65536  
 SOLVENT C6D6  
 NS 16  
 DS 2  
 SWH 8223.685 Hz  
 FIDRES 0.125483 Hz  
 AQ 3.9846387 sec  
 RG 32.11  
 DW 60.800 usec  
 DE 6.50 usec  
 TE 300.2 K  
 D1 1.00000000 sec  
 TD0 1

===== CHANNEL f1 =====  
 NUC1 1H  
 P1 15.00 usec  
 PLW1 12.52000046 W  
 SFO1 400.1724712 MHz

F2 - Processing parameters  
 SI 85536  
 SF 400.1700045 MHz  
 EM  
 WDW 0  
 SSB 0  
 LB 0.30 Hz  
 GB 0  
 PC 1.00

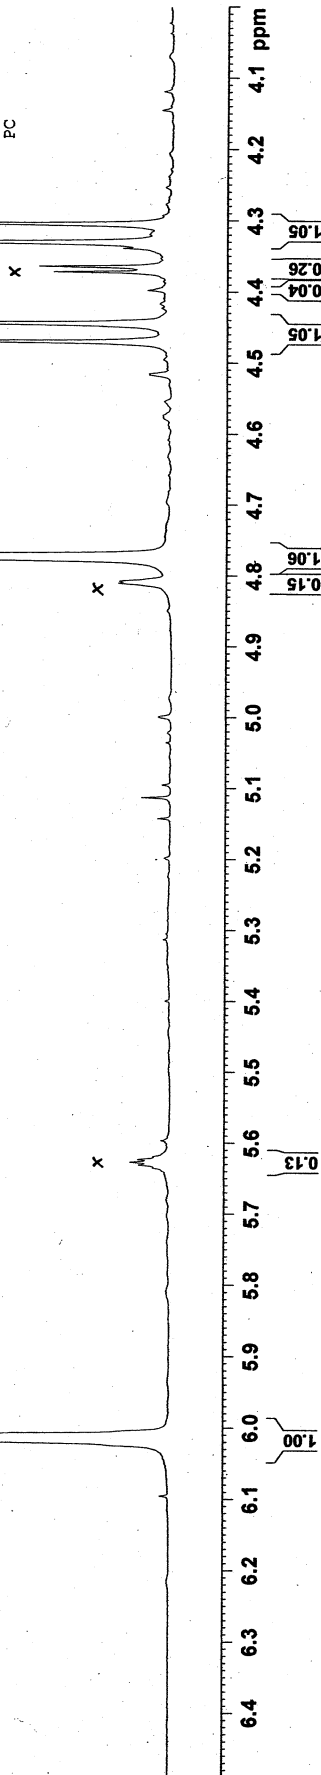

Table 4. Entry 3

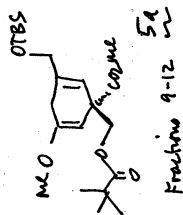

```

Current Data Parameters
NAME          DUH-III-252
EXPNO         1
PROCNO        1

F2 - Acquisition Parameters
Date_         20120710
Time_         19.20
INSTRUM       spect
PROBHD        5 mm PABBO BB/
PULPROG       zg30
TD            65536
SOLVENT       CDCl3
NS            16
DS            2
SWH           8223.695 Hz
SF            0.125463 Hz
FIDRES        3.9846357 sec
AQ            61.71
RG            60.800 usec
DW            6.50 usec
DE            300.2 K
TE            1.00000000 sec
D1            1
TD0           1

===== CHANNEL f1 =====
NUC1          1H
P1            15.00 usec
PLW1          12.52000046 W
SFO1          400.1724712 MHz

F2 - Processing parameters
SI            65536
SF            400.1700041 MHz
WDW           EM
SSB           0
LB            0
GB            0
PC            1.00

```

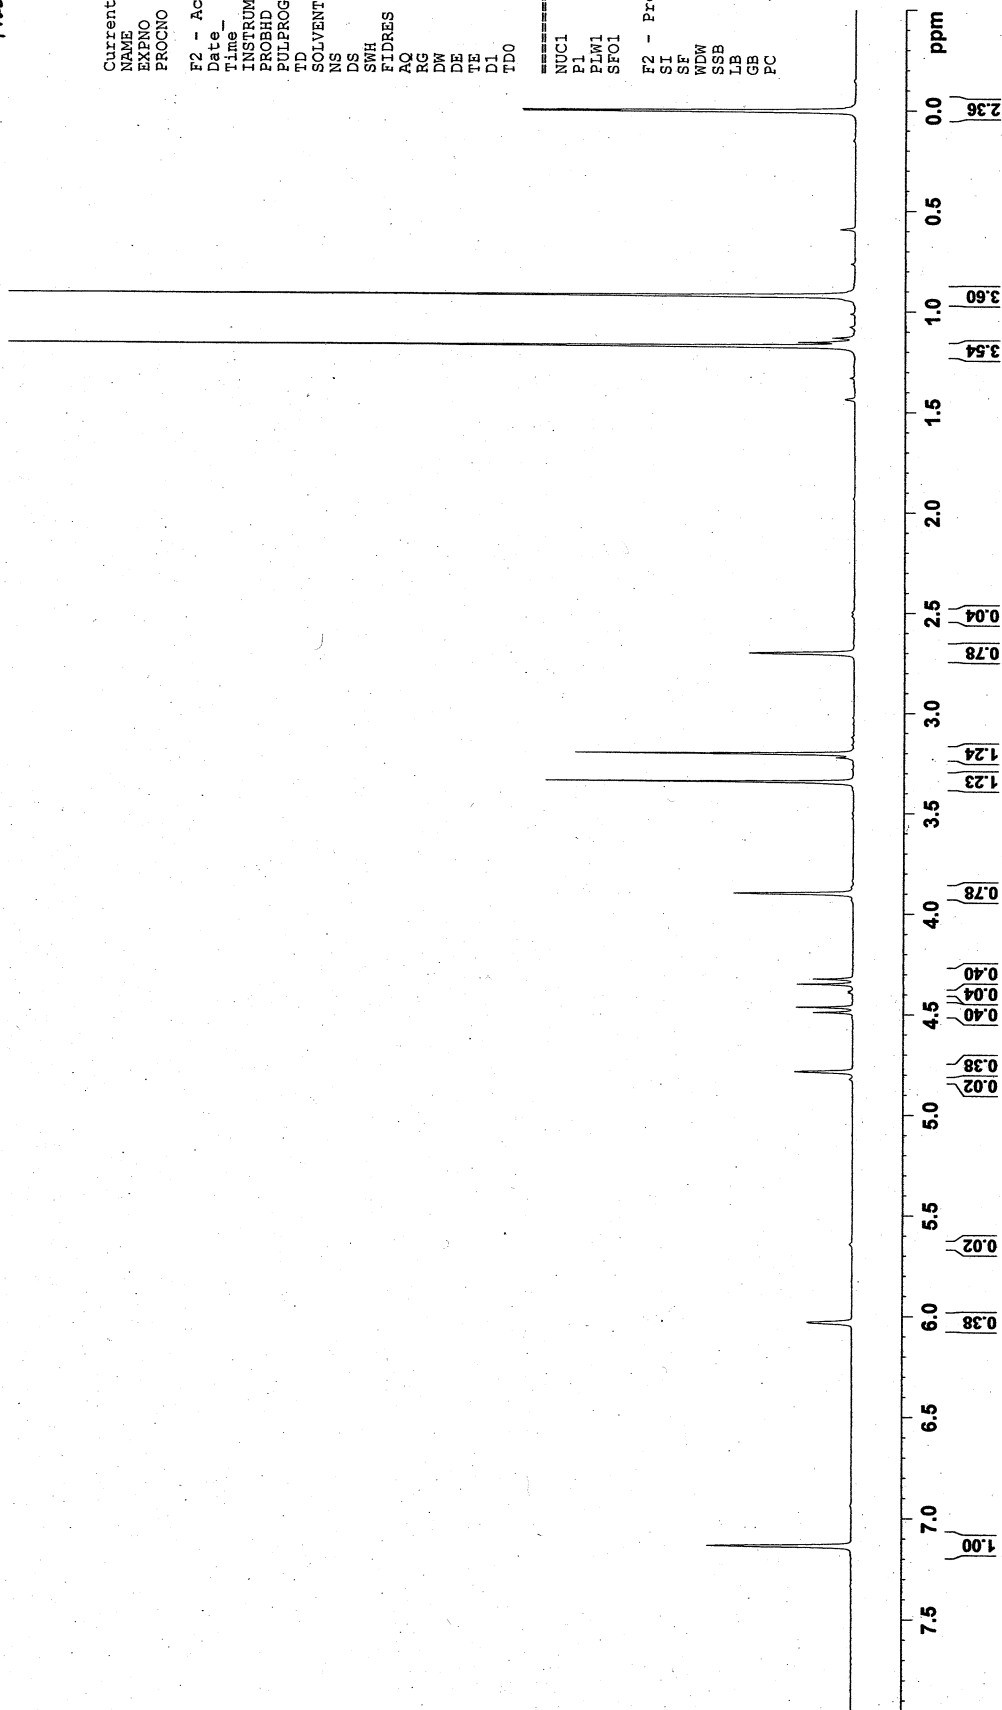

CC1=CC=C(C=C1)C(=O)O  
 59  
 PVO  
 Fructose 9-12

Table 4 Entry 3  
 purified

Current Data Parameters

|        |             |
|--------|-------------|
| NAME   | DJH-III-292 |
| EXPNO  | 2           |
| PROCNO | 1           |

F2 - Acquisition Parameters

|         |                |
|---------|----------------|
| Date_   | 20120711       |
| Time    | 4.12           |
| INSTRUM | spect          |
| PROBHD  | 5 mm PABBO BB/ |
| PULPROG | zgpg30         |
| TD      | 65536          |
| SOLVENT | COD6           |
| NS      | 1024           |
| DS      | 4              |
| SWH     | 24038.461 Hz   |
| FIDRES  | 0.366798 Hz    |
| AQ      | 1.3631988 sec  |
| RG      | 2050           |
| DW      | 20.800 usec    |
| DE      | 6.50 usec      |
| TE      | 300.2 K        |
| D1      | 2.00000000 sec |
| D11     | 0.03000000 sec |
| TD0     | 1              |

===== CHANNEL f1 =====

|      |                 |
|------|-----------------|
| NUC1 | <sup>13</sup> C |
| P1   | 9.50 usec       |
| PLW1 | 48.00000000 W   |
| SFO1 | 100.6328883 MHz |

===== CHANNEL f2 =====

|         |                 |
|---------|-----------------|
| CPDPRG2 | waltz16         |
| NUC2    | <sup>1</sup> H  |
| PCPD2   | 80.00 usec      |
| PLM2    | 12.52000046 W   |
| PLW2    | 0.44016001 W    |
| PLW3    | 0.28169999 W    |
| SFO2    | 400.1716007 MHz |

F2 - Processing parameters

|     |                 |
|-----|-----------------|
| SI  | 32768           |
| SF  | 100.6228049 MHz |
| WDW | EM              |
| SSB | 0               |
| LB  | 1.00 Hz         |
| GB  | 0               |
| PC  | 1.40            |

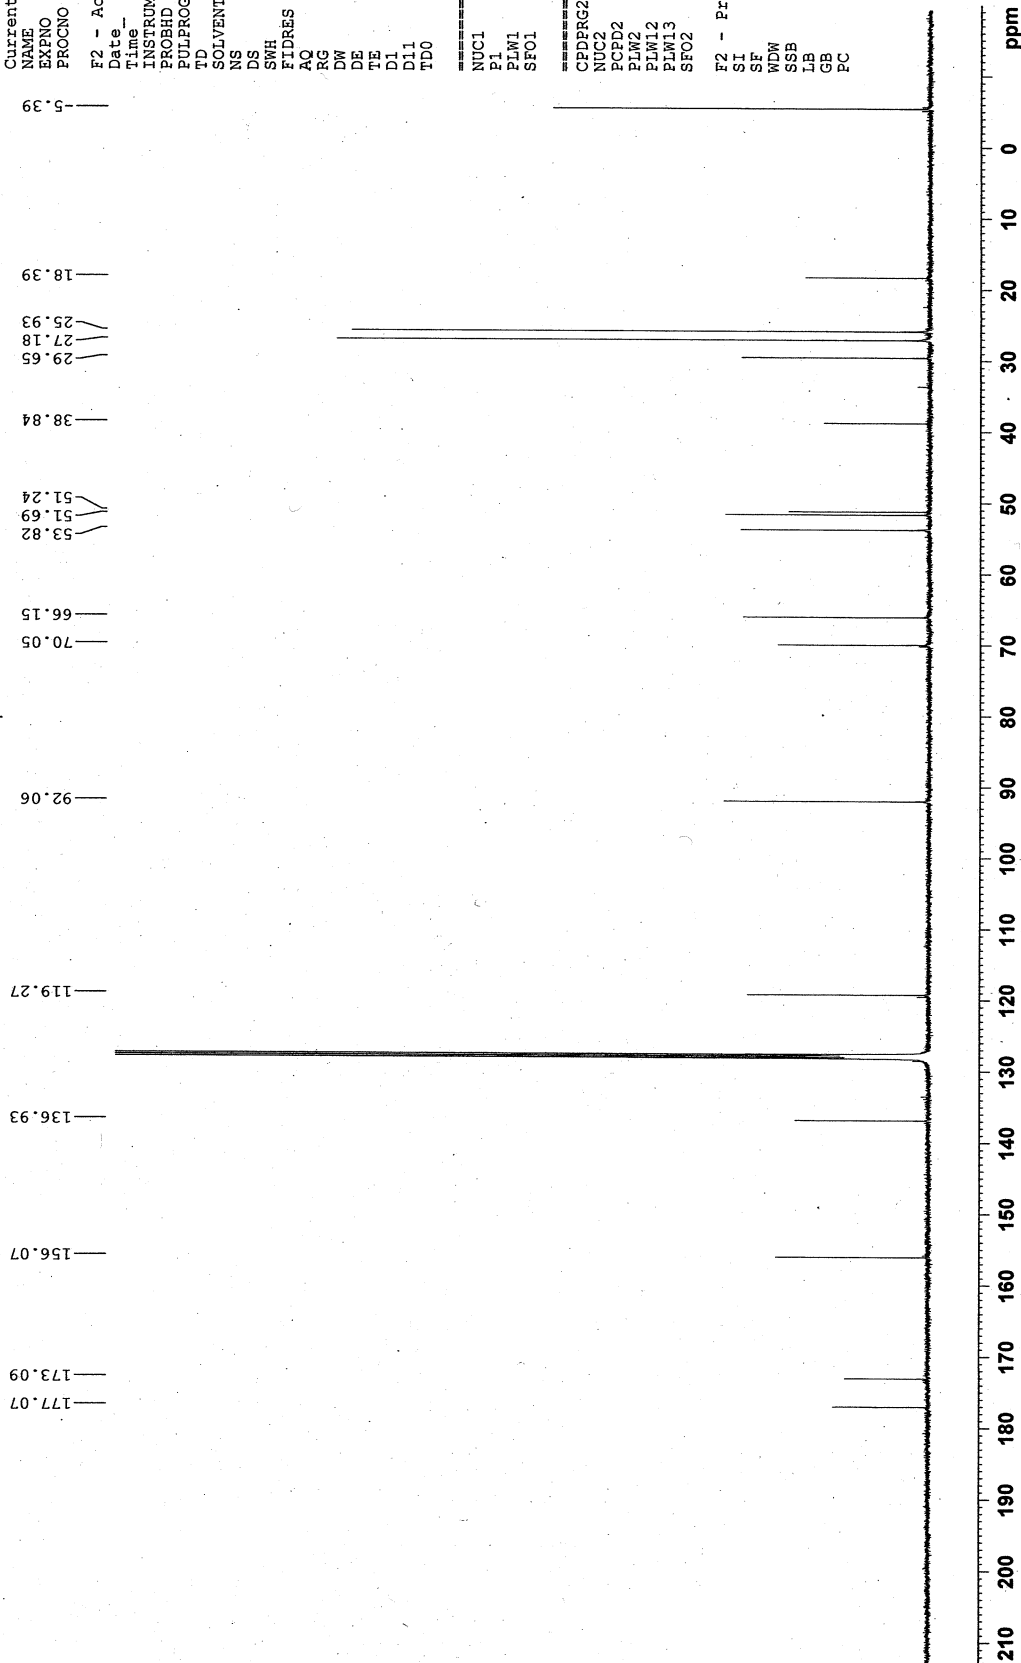

Table 4 Entry 3

CC(C)(C)C1=CC=C(C=C1)C(=O)OC + CC(C)(C)C1=CC=C(C=C1)C(=O)OC
  
 100 75 = 4:3

Fraction 13

Current Data Parameters  
 NAME DJH-III-292-13  
 EXPNO 1  
 PROCNO 1

F2 - Acquisition Parameters  
 Date\_ 20120711  
 Time 14.21  
 INSTRUM spect  
 PROBHD 5 mm PABBO BB/  
 PULPROG zg30  
 TD 65536  
 SOLVENT C6D6  
 NS 16  
 DS 2  
 SWH 8223.685 Hz  
 FIDRES 0.125483 Hz  
 AQ 3.9946387 sec  
 RG 79.06  
 DW 60.800 usec  
 DE 6.50 usec  
 TE 300.2 K  
 D1 1.00000000 sec  
 TD0 1

CHANNEL f1  
 NUC1 1H  
 P1 15.00 usec  
 PLW1 12.5200046 W  
 SFO1 400.172412 MHz

F2 - Processing parameters  
 SI 65536  
 SF 400.1700066 MHz  
 WDW EM  
 SSB 0  
 LB 0  
 GB 0  
 PC 1.00

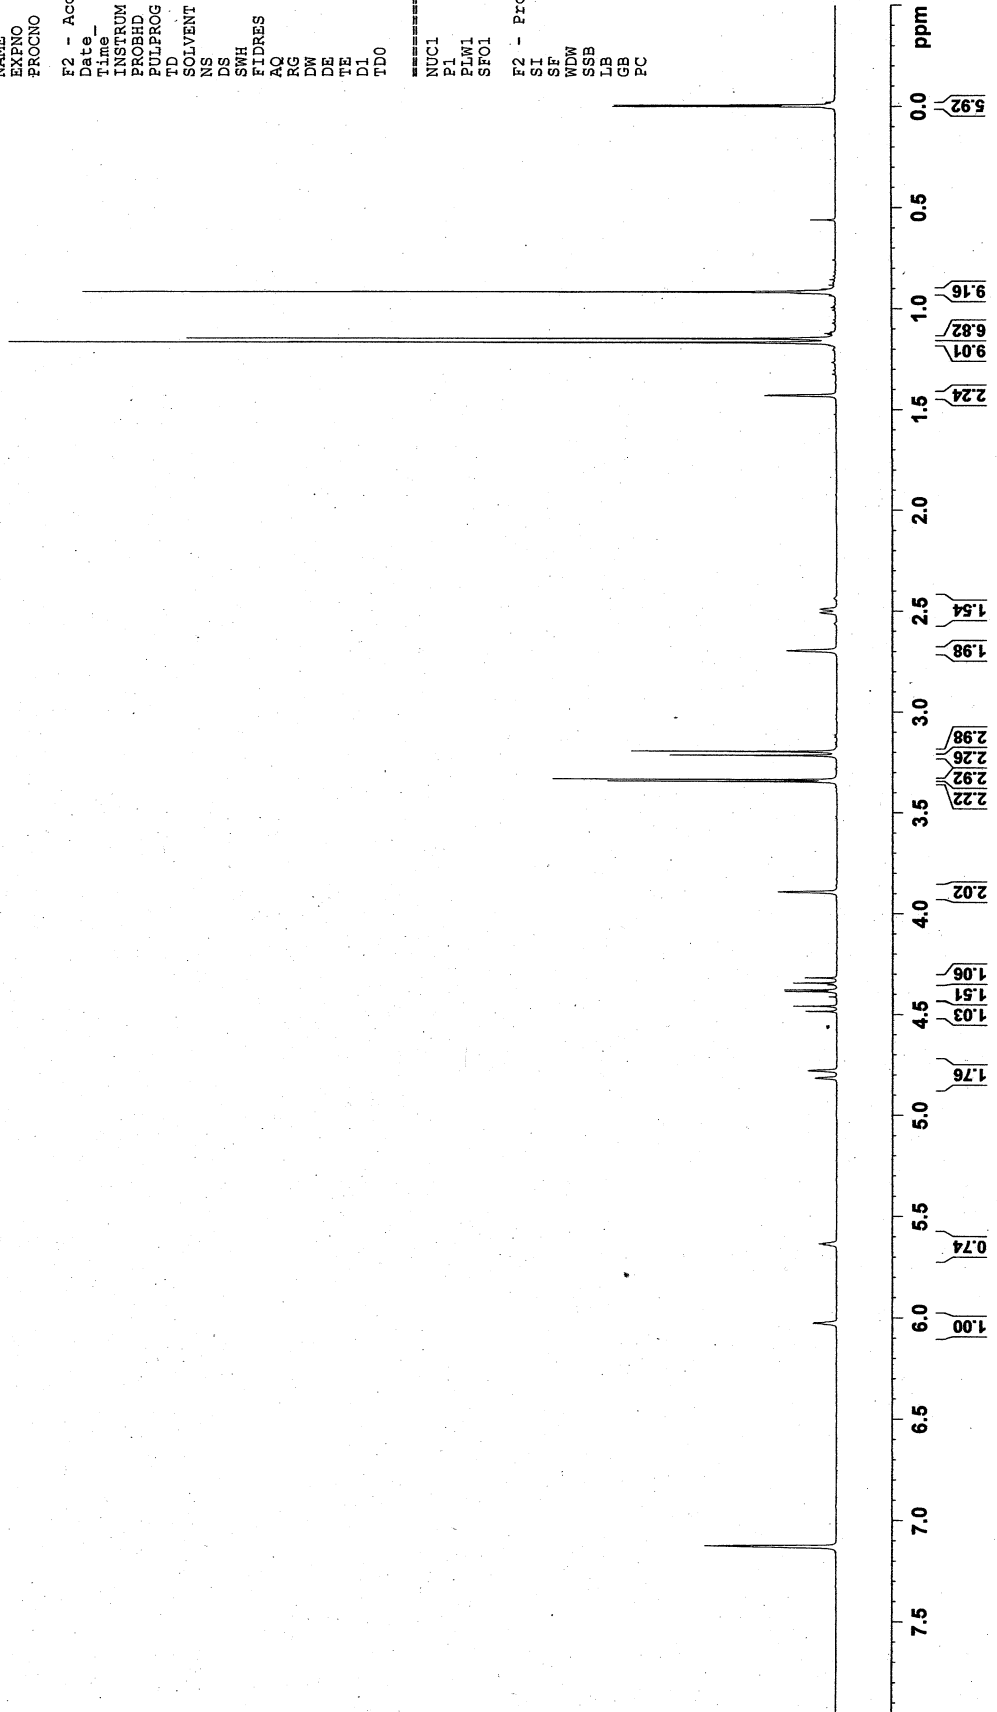



Fraction 13

5a + 5b Upfield expansion

Current Data Parameters  
NAME DJH-III-292-13  
EXPNO 1  
PROCNO 1

F2 - Acquisition Parameters  
Date\_ 20120711  
Time 14.21  
INSTRUM spect  
PROBHD 5 mm PABBO BB/  
PULPROG zg30  
TD 65536  
SOLVENT C6D6  
NS 16  
DS 2  
SWH 8223.685 Hz  
FIDRES 0.125493 Hz  
AQ 3.9846387 sec  
RG 79.06  
DW 60.800 usec  
DE 6.50 usec  
TE 300.2 K  
D1 1.00000000 sec  
TD0 1

===== CHANNEL f1 =====  
NUC1 1H  
P1 15.00 usec  
PLW1 12.52000046 W  
SFO1 400.1724712 MHz

F2 - Processing parameters  
SI 65536  
SF 400.1700066 MHz  
WDW EM  
SSB 0  
LB 0.30 Hz  
GB 0  
PC 1.00

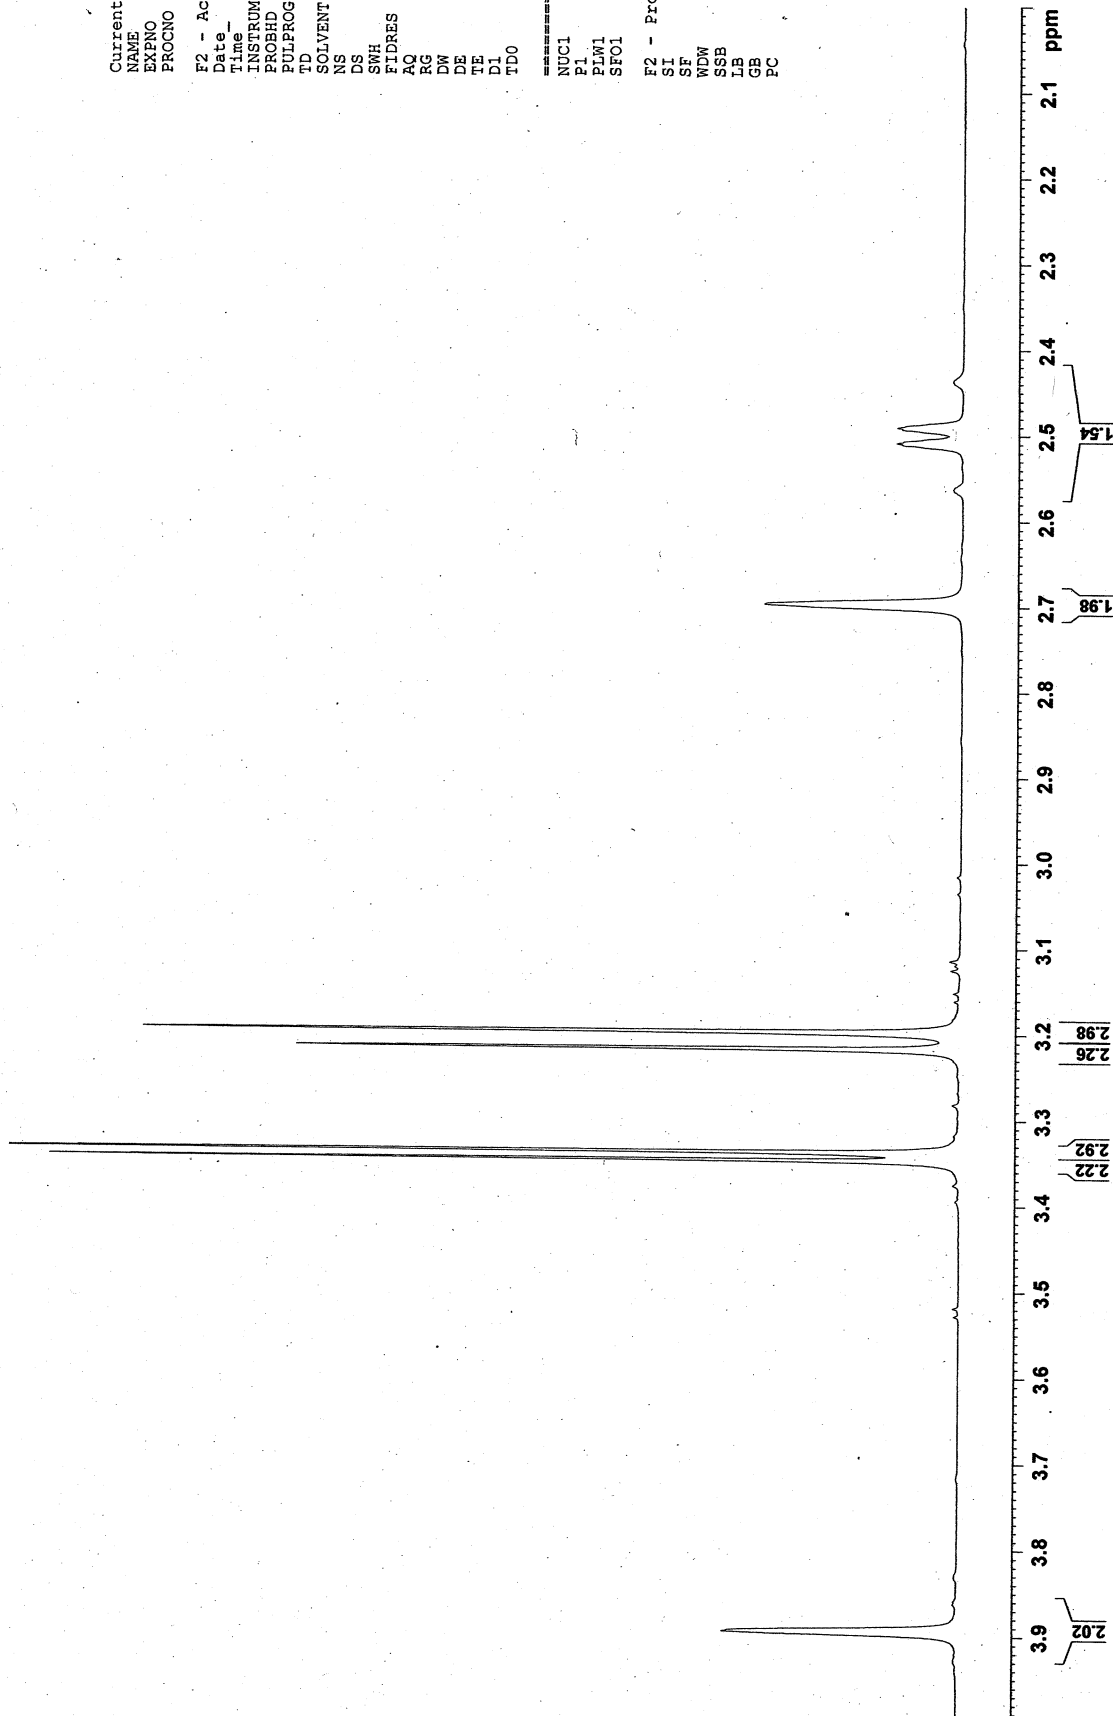

S24



Table 4 Entry 3  
 Fraction 13  
 Expanded

OTBS  
 +  
 AVO  
 AVO  
 5b  
 5a

Current Data Parameters  
 NAME DJH-III-292-13  
 EXPNO 1  
 PROCNO 1

F2 - Acquisition Parameters  
 Date\_ 20120711  
 Time\_ 14.21  
 INSTRUM spect  
 PROBD 5 mm PABBO BB7  
 PULPROG zg30  
 ID 65536  
 SOLVENT C6D6  
 NS 16  
 DS 2  
 SWH 8223.685 Hz  
 FIDRES 0.125483 Hz  
 AQC 3.9846387 sec  
 RG 79.06  
 DW 60.800 usec  
 DE 6.50 usec  
 TE 300.2 K  
 D1 1.00000000 sec  
 TDO 1

===== CHANNEL f1 =====  
 NUC1 1H  
 P1 15.00 usec  
 PLW1 12.5200046 W  
 SFO1 400.1724712 MHz

F2 - Processing parameters  
 SI 65536  
 SF 400.1700066 MHz  
 WDW EM  
 SSB 0  
 LB 0  
 GB 0  
 PC 1.00

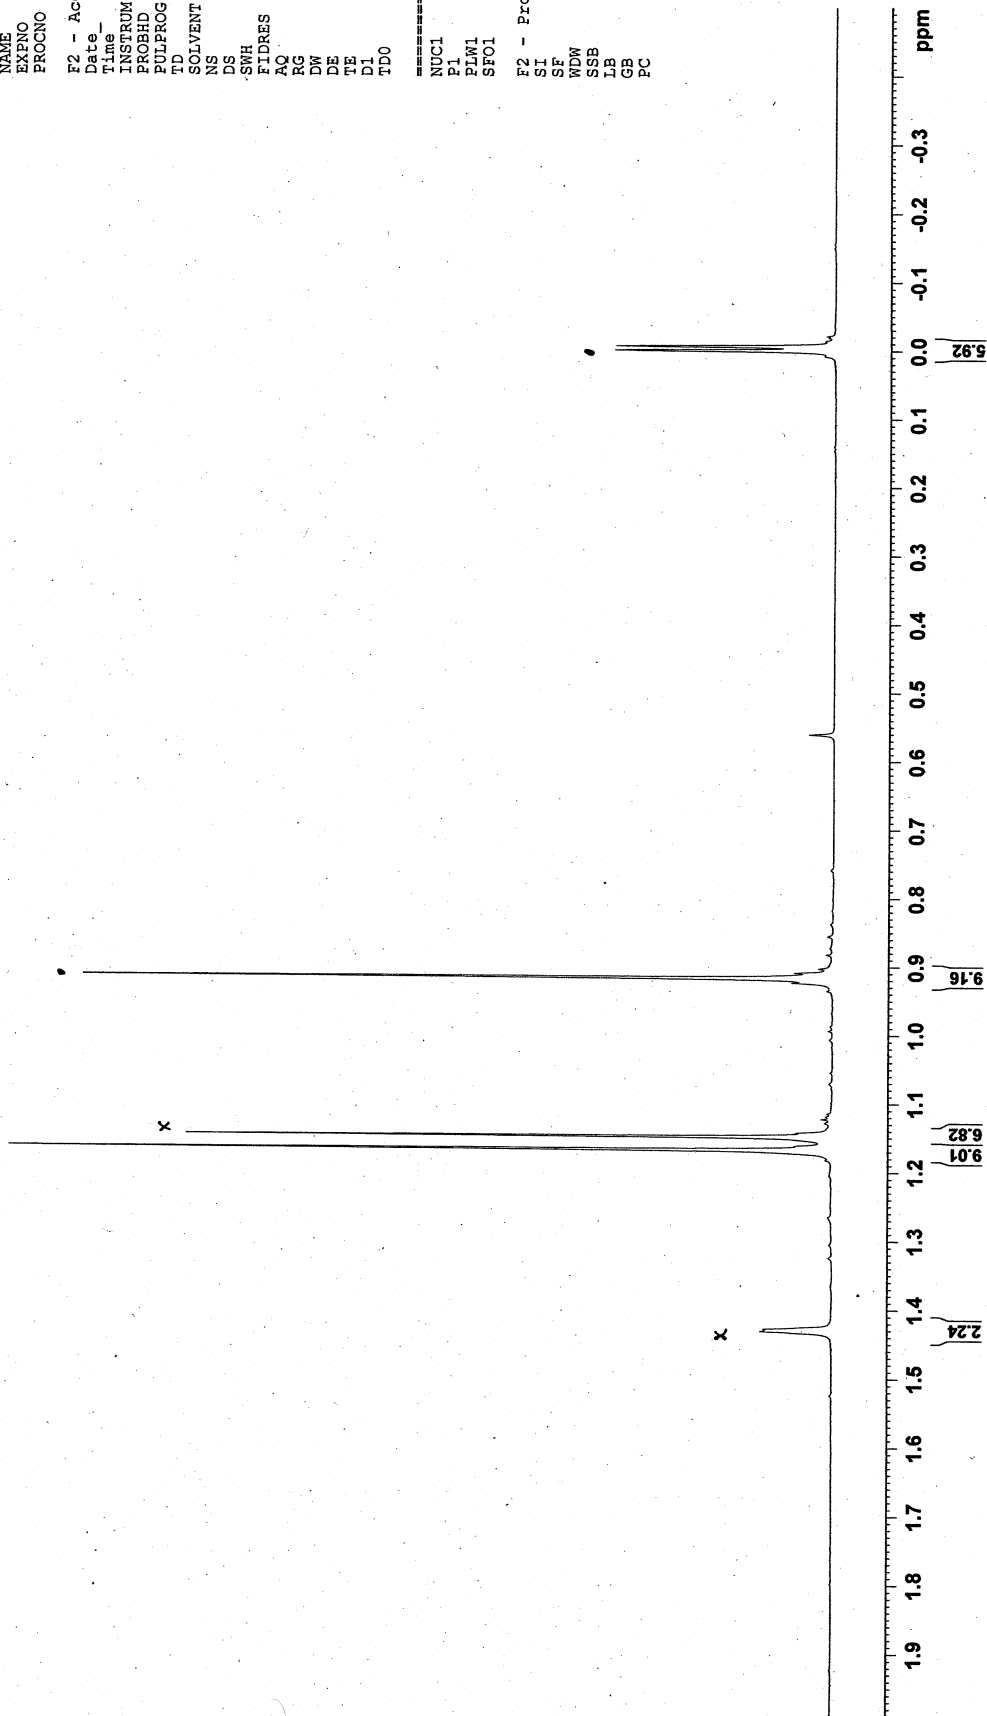

$\text{PivOCH}_2\text{I}$

Material used in synthesis

The Ohio State University  
Department of Chemistry  
NMR Facility

1.047  
1.097  
1.105  
1.110  
1.118  
1.128  
1.168  
1.192  
1.209  
1.229  
1.267  
1.270  
1.290  
1.304  
1.325  
1.366  
1.380  
1.414  
1.425  
1.447

$\text{PivOCH}_2\text{I}$

$\text{PivOCH}_2\text{I}$

$\text{CH}_2\text{Cl}_2$

$\text{PivOCH}_2\text{Cl}$

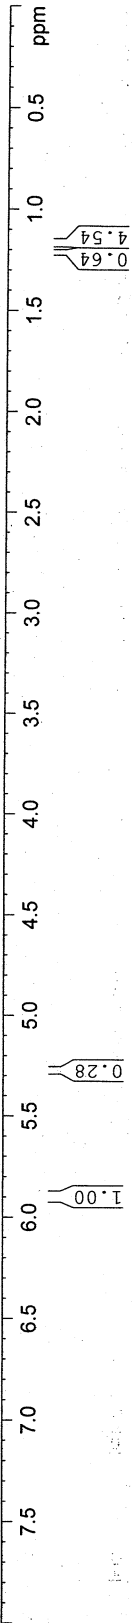

Current Data Parameters  
NAME DUH-III-93b  
EXPNO 1  
PROCNO 1

F2 - Acquisition Parameters  
Date\_ 20110208  
Time 10.05  
INSTRUM spect  
PROBHD 5 mm QNP 1H/13  
PULPROG zg30  
TD 65536  
SOLVENT CDCl3  
NS 16  
DS 2  
SWH 8278.146 Hz  
FIDRES 0.126314 Hz  
AQ 3.9584243 sec  
RG 90.5  
DM 60.400 usec  
DE 6.00 usec  
TE 300.2 K  
D1 1.00000000 sec  
TD0 1

===== CHANNEL f1 =====  
NUC1 1H  
P1 13.00 usec  
PL1 0.00 dB  
SFO1 400.1324710 MHz

F2 - Processing parameters  
SI 32768  
SF 400.1300179 MHz  
WDW EM  
SSB 0  
LB 0.30 Hz  
GB 0  
PC 1.00

2.069  
1.952  
1.365  
1.347  
1.307  
1.274  
1.263  
1.260  
1.249  
1.208  
1.163  
1.147  
1.139  
1.107  
1.077  
1.062  
1.046  
0.904  
0.885  
0.856

Piv OH<sub>2</sub>eI  
(pushed)

The Ohio State University  
Department of Chemistry  
NMR Facility

Current Data Parameters  
NAME DJH-III-93a  
EXPNO 1  
PROCNO 1

F2 - Acquisition Parameters  
Date\_ 20110208  
Time\_ 10.11  
INSTRUM spect  
PROBHD 5 mm QNP 1H/13  
PULPROG zgpg30  
TD 65536  
SOLVENT CDCl<sub>3</sub>  
NS 4  
DS 2  
SWH 8278.146 Hz  
FIDRES 0.126314 Hz  
AQ 3.9584243 sec  
RG 71.8  
DW 60.400 usec  
DE 6.00 usec  
TE 300.2 K  
D1 1.00000000 sec  
TD0 1

===== CHANNEL f1 =====  
NUC1 1H  
P1 13.00 usec  
PL1 0.00 dB  
SFO1 400.1324710 MHz

F2 - Processing parameters  
SI 32768  
SF 400.1300174 MHz  
WDW EM  
SSB 0  
LB 0.30 Hz  
GB 0  
PC 1.40

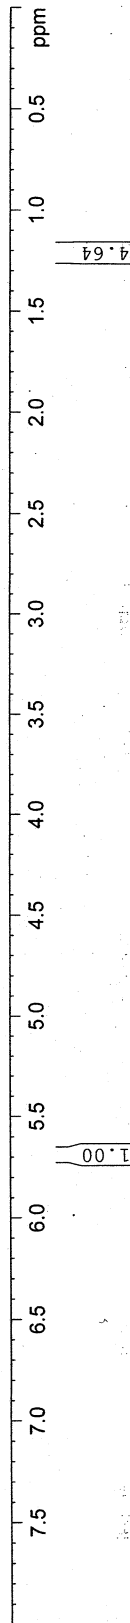

Scheme 5

Mechanistic Experiment

T → -28°C.

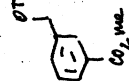

1. Li, NMe<sub>3</sub>, tBuOH, THF, -65°C
  2. -65°C → -28°C
  3. -28°C → -65°C
  4. CH<sub>3</sub>I
  5. NaHCl
- crude product

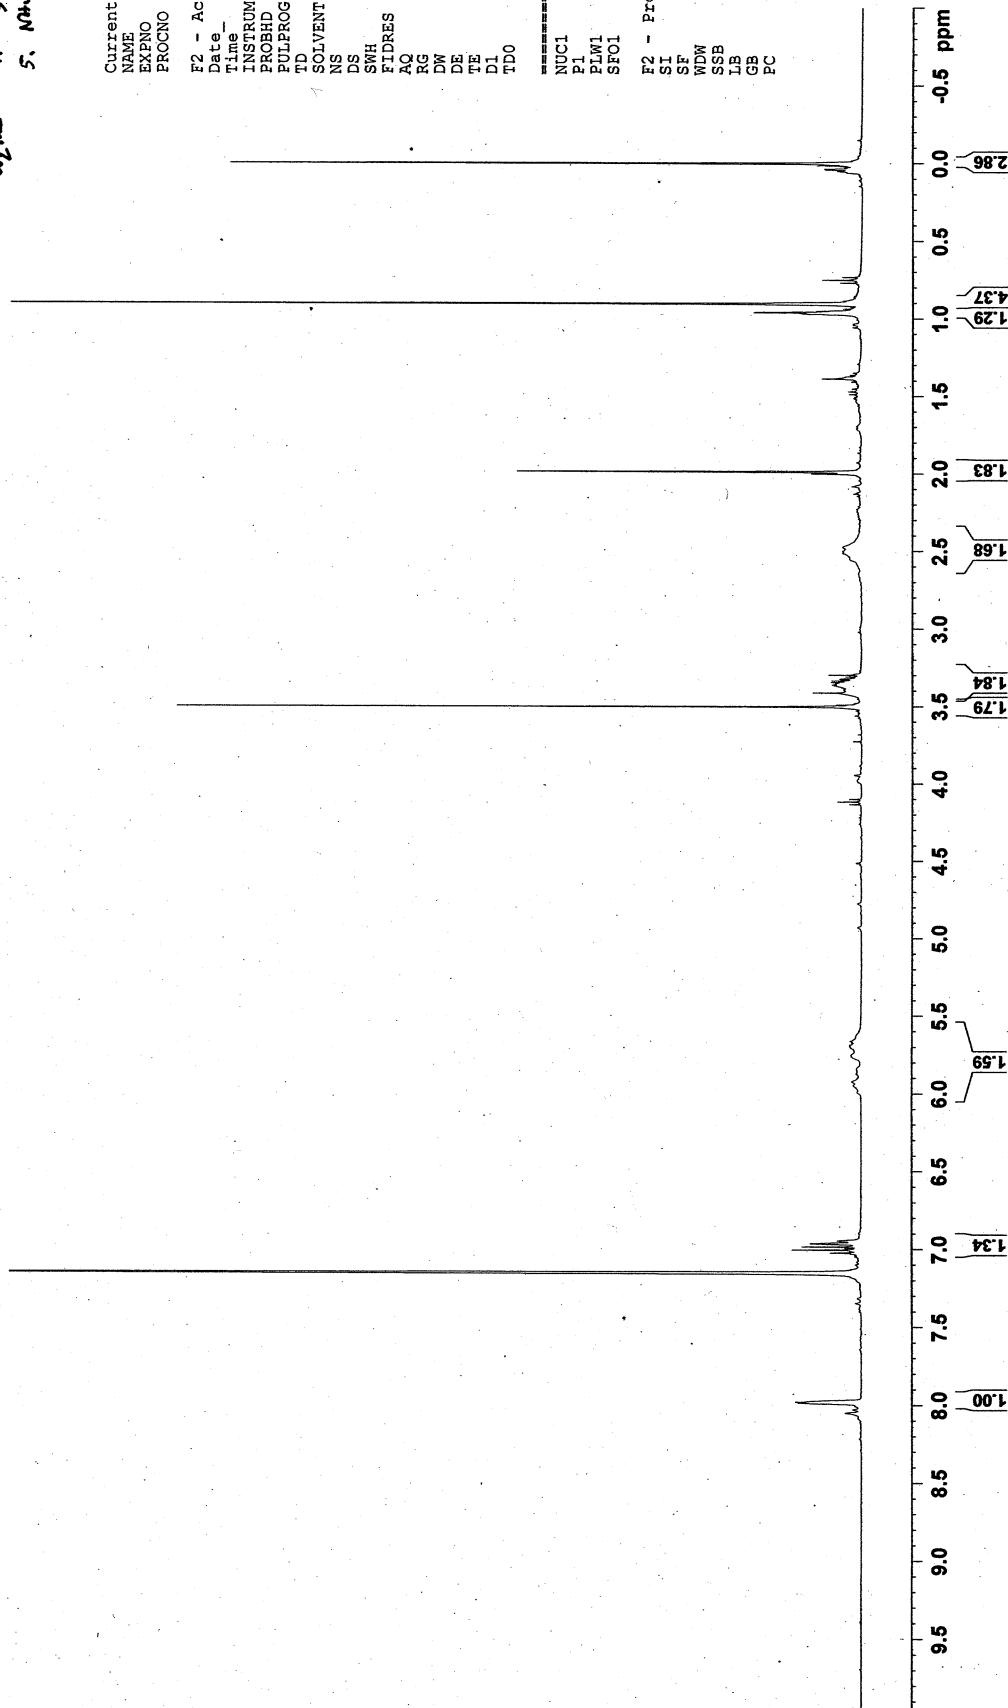

Current Data Parameters  
 NAME DJH-III-278  
 EXPNO 1  
 PROCNO 1

F2 - Acquisition Parameters  
 Date\_ 20120502  
 Time\_ 16.33  
 INSTRUM spect  
 PROBD 5 mm PABBO BB7  
 PULPROG zg30  
 TD 65536  
 SOLVENT C6D6  
 NS 16  
 DS 2  
 SWH 8223.685 Hz  
 FIDRES 0.125483 Hz  
 AQ 3.9846387 sec  
 RG 148.14  
 DW 60.800 usec  
 DE 6.50 usec  
 TE 300.2 K  
 DI 1.00000000 sec  
 TDO 1

CHANNEL f1  
 NUC1 1H  
 P1 15.00 usec  
 PLW1 12.52000046 W  
 SFO1 400.1724712 MHz

F2 - Processing parameters  
 SI 65536  
 SF 400.1699990 MHz  
 WDW EM  
 SSB 0  
 LB 0.30 Hz  
 GB 0  
 PC 1.00

24mg

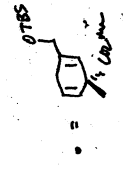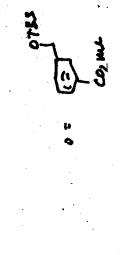

Mechanistic Experiment  
Scheme 5

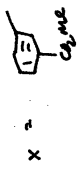

Current Data Parameters  
NAME DUH-III-279-56  
EXPNO 1  
PROCNO 1  
F2 - Acquisition Parameters  
Date\_ 20120507  
Time 13.29  
INSTRUM spect  
PROBHD 5 mm PABBO BB/  
PULPROG zg30  
TD 65536  
SOLVENT C6D6  
NS 16  
DS 2  
SWH 823.685 Hz  
FIDRES 0.125483 Hz  
AQ 3.9846387 sec  
RG 79.06  
DE 60.800 use  
TE 6.50 use  
D1 300.2 K  
D1 1.00000000 sec  
TD0 1  
===== CHANNEL f1 =====  
NUC1 1H  
P1 15.00 use  
PLW1 12.52000046 W  
SFO1 400.1724712 MHz  
F2 - Processing parameters  
SI 65536  
SF 400.1700046 MHz  
WDW EM  
SSB 0  
LB 0.30 Hz  
GB 0  
PC 1.00

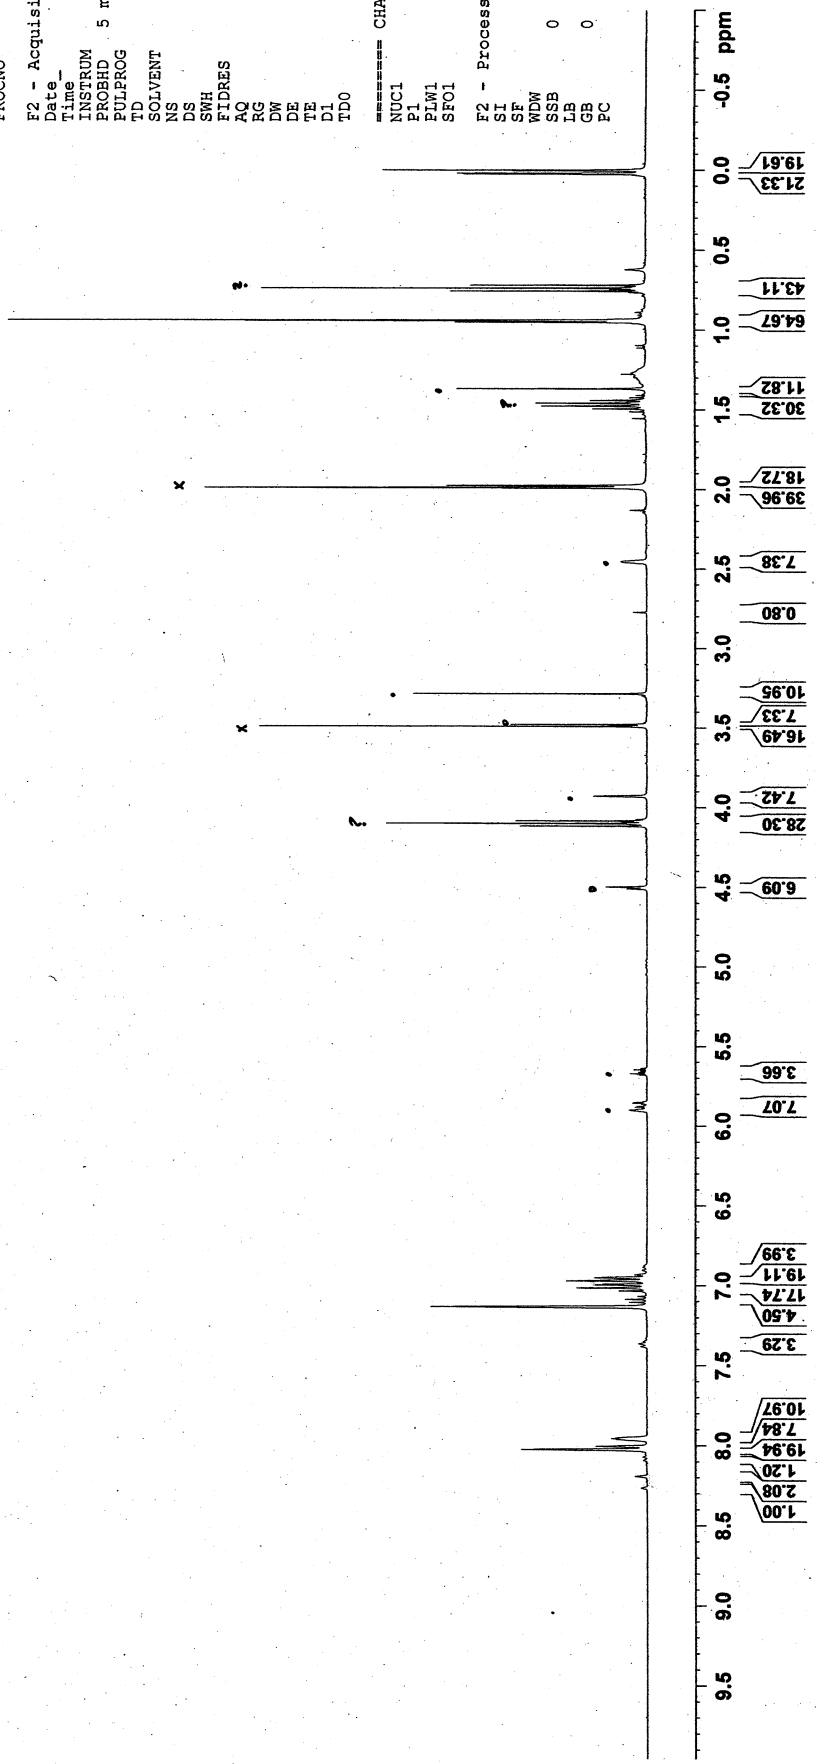

74 mg

Fractions 7-8

chromatographed

OTBS 1.  $\text{LiNH}_2$ ,  $\text{tBuOH}$ , THF

-65°C

2. -65°C → -28°C

3. -28°C → -65°C

4.  $\text{CH}_3\text{I}$ 5.  $\text{NH}_4\text{Cl}$ 

Scheme 5

Mechanism

Experiment

major product

Current Data Parameters  
 NAME DJH-III-279-78  
 EXPNO 1  
 PROCNO 1

F2 - Acquisition Parameters  
 Date\_ 20120507  
 Time 13.50  
 INSTRUM spect  
 PROBHD 5 mm PABBO BB/  
 PULPROG zg30  
 TD 65536  
 SOLVENT C6D6  
 NS 16  
 DS 2  
 SWH 8223.685 Hz  
 FIDRES 0.125483 Hz  
 AQ 3.9846387 sec  
 RG 32.11  
 DW 60.800 usec  
 DE 6.50 usec  
 TE 300.2 K  
 D1 1.00000000 sec  
 TD0 1

CHANNEL f1  
 NUC1  $^1\text{H}$   
 P1 15.00 usec  
 PLW1 12.52000046 W  
 SFO1 400.1724712 MHz

F2 - Processing Parameters  
 SI 83536  
 SF 400.1700032 MHz  
 WDW EM  
 SSB 0  
 LB 0.30 Hz  
 GB 0  
 PC 1.00

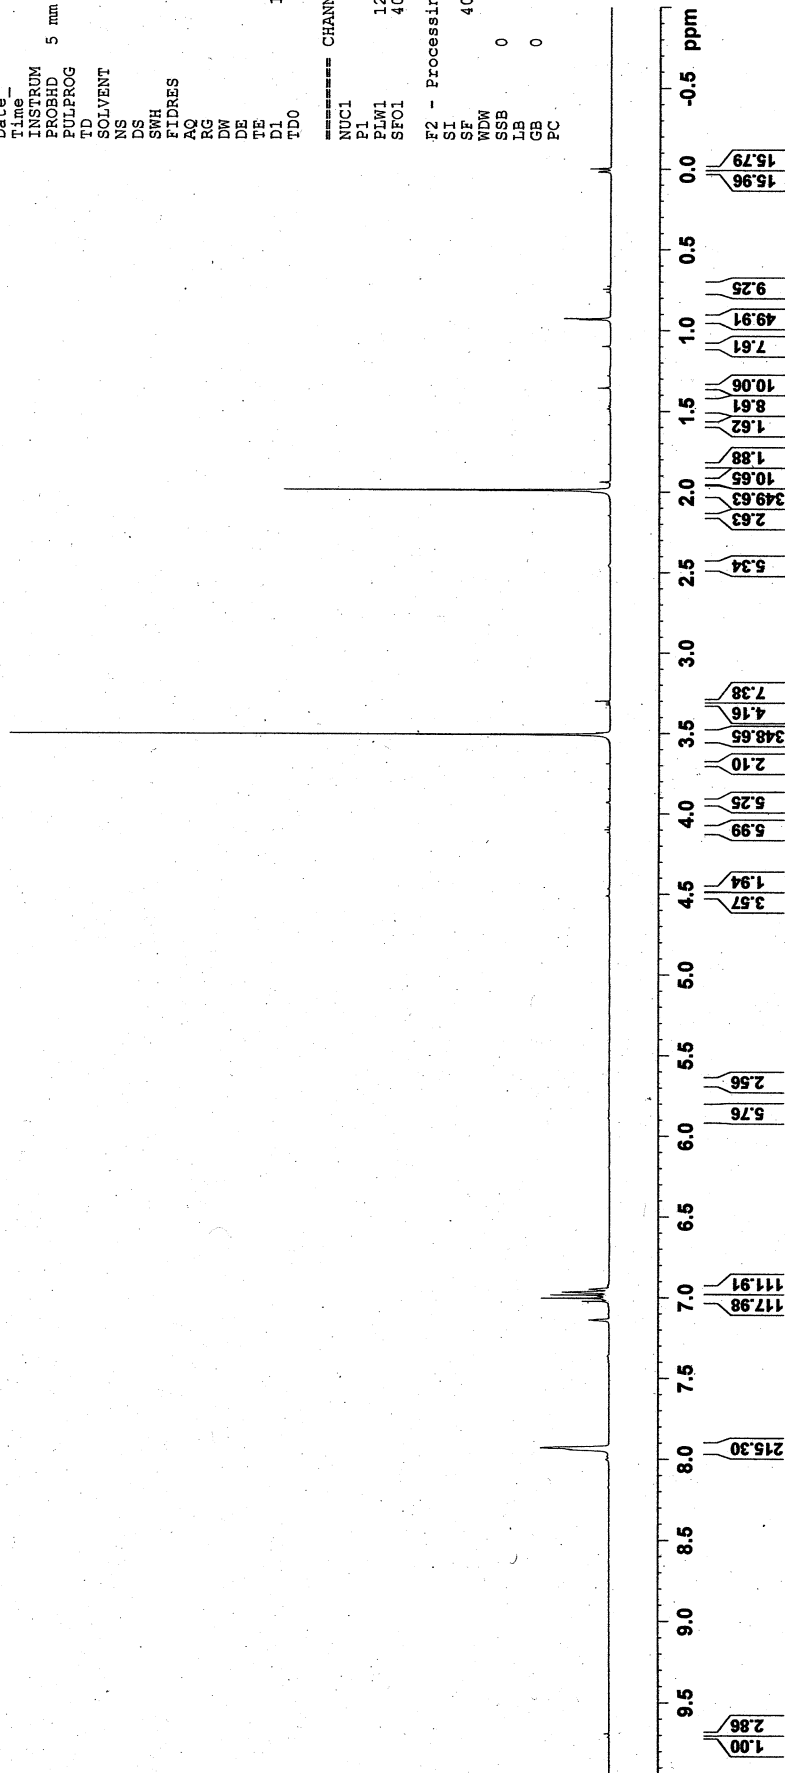

Supplement: Supplementary file 1 [file 4098052]
